# Supplementary material for: Glycaemic control in type 2 diabetes patients and its predictors: a retrospective database study at a tertiary care diabetes centre in Ningbo, China
Source: PubMed Central journal article supplement — BMJ Open. 2018 Mar 25;8(3):e019697. doi: 10.1136/bmjopen-2017-019697 (PMC5875602; doi:10.1136/bmjopen-2017-019697), 2018-03-25
Supplement: bmjopen-2017-019697.draft_revisions.pdf [file bmjopen-2017-019697.draft_revisions.pdf]

# BMJ Open

BMJ Open is committed to open peer review. As part of this commitment we make the peer review history of every article we publish publicly available.

When an article is published we post the peer reviewers' comments and the authors' responses online. We also post the versions of the paper that were used during peer review. These are the versions that the peer review comments apply to.

The versions of the paper that follow are the versions that were submitted during the peer review process. They are not the versions of record or the final published versions. They should not be cited or distributed as the published version of this manuscript.

BMJ Open is an open access journal and the full, final, typeset and author-corrected version of record of the manuscript is available on our site with no access controls, subscription charges or pay-per-view fees (<http://bmjopen.bmj.com>).

If you have any questions on BMJ Open's open peer review process please email [info.bmjopen@bmj.com](mailto:info.bmjopen@bmj.com)

# BMJ Open

## Glycaemic control in type 2 diabetes patients and its predictors: a retrospective database study at a tertiary care Diabetes Centre in Ningbo, China

|                                 |                                                                                                                                                                                                                                                                                                                                                                                                                                                                          |
|---------------------------------|--------------------------------------------------------------------------------------------------------------------------------------------------------------------------------------------------------------------------------------------------------------------------------------------------------------------------------------------------------------------------------------------------------------------------------------------------------------------------|
| Journal:                        | <i>BMJ Open</i>                                                                                                                                                                                                                                                                                                                                                                                                                                                          |
| Manuscript ID                   | bmjopen-2017-019697                                                                                                                                                                                                                                                                                                                                                                                                                                                      |
| Article Type:                   | Research                                                                                                                                                                                                                                                                                                                                                                                                                                                                 |
| Date Submitted by the Author:   | 19-Sep-2017                                                                                                                                                                                                                                                                                                                                                                                                                                                              |
| Complete List of Authors:       | Li, Jialin; Department of Endocrinology and Metabolism Chattopadhyay, Kaushik; University of Nottingham School of Health Sciences, ; London School of Hygiene and Tropical Medicine, Xu, Miao; Department of Endocrinology and Metabolism Chen, Yanshu; Department of Endocrinology and Metabolism Hu, Fangfang; Department of Endocrinology and Metabolism Chu, Jianping; Department of Endocrinology and Metabolism li, li; Department of Endocrinology and Metabolism |
| <b>Primary Subject Heading</b>: | Diabetes and endocrinology                                                                                                                                                                                                                                                                                                                                                                                                                                               |
| Secondary Subject Heading:      | Epidemiology                                                                                                                                                                                                                                                                                                                                                                                                                                                             |
| Keywords:                       | Type 2 diabetes, Poor glycaemic control, China                                                                                                                                                                                                                                                                                                                                                                                                                           |
|                                 |                                                                                                                                                                                                                                                                                                                                                                                                                                                                          |

SCHOLARONE™  
Manuscripts

Only

**Title**

Glycaemic control in type 2 diabetes patients and its predictors: a retrospective database study at a tertiary care Diabetes Centre in Ningbo, China

Jialin Li\*<sup>1</sup>, Kaushik Chattopadhyay\*<sup>2</sup>, Miao Xu<sup>1</sup>, Yanshu Chen<sup>1</sup>, Fangfang Hu<sup>1</sup>, Jianping Chu<sup>1</sup>, Li Li<sup>1</sup>

<sup>1</sup> Department of Endocrinology and Metabolism, Ningbo First Hospital, Ningbo, PR China

<sup>2</sup> Division of Epidemiology and Public Health, School of Medicine, The University of Nottingham, Nottingham, UK

\* Co-first authors

Corresponding author: Dr. Li Li, Ningbo First Hospital, Liuting Street 59, Ningbo City, Zhejiang Province, PR China; Tel: +8613757426626; E-mail address: lilyningbo@163.com

## Abstract

Objectives: The aim of the study was to assess glycaemic control in type 2 diabetes (T2DM) patients at a tertiary care Diabetes Centre in Ningbo, China, and to determine factors that independently predict their glycaemic control.

Design: Retrospective cross-sectional study using an existing database, the Diabetes Information Management System.

Setting: Tertiary care Diabetes Centre in Ningbo, China.

Participants: The study included adult T2DM patients, registered and received treatment at the Diabetes Centre for at least six consecutive months. Those diagnosed with type 1 diabetes, gestational diabetes, secondary diabetes, unknown type of diabetes or endocrine diseases were excluded from the study. The study inclusion criteria were satisfied by 1387 patients, from 1 July 2012 to 30 June 2017.

Primary outcome measure: Glycaemic control (poor was defined as glycated haemoglobin (HbA1c)  $\geq 7\%$  or fasting blood glucose (FBG)  $> 7.0$  mmol/L).

Results: In terms of HbA1c and FBG, the 5-year period prevalence of poor glycaemic control was 50.3% (n=698) and 57.3% (n=791), respectively. In terms of HbA1c and FBG, the odds of poor glycaemic control increased with the duration of T2DM ( $p < 0.001$ ), were lower in patients residing in urban areas ( $p < 0.001$  and  $p = 0.023$ , respectively), only on diet and physical activity as part of their T2DM therapeutic regimen ( $p < 0.001$  and  $p = 0.003$ , respectively), and without hyperlipidemia ( $p = 0.013$  and  $p = 0.004$ , respectively).

Conclusions: More than half of T2DM patients at the Diabetes Centre in Ningbo, China have poor glycaemic control, and the predictors of glycaemic control were identified. The study findings could be taken into consideration in future interventional studies aimed at improving glycaemic control in these patients.

## Keywords

Type 2 diabetes; poor glycaemic control; China

### Strengths and limitations of this study

- This is the first study to explore glycaemic control in type 2 diabetes patients at the tertiary care Diabetes Centre in Ningbo, China and, as far as we are aware, in the Zhejiang province of China.
- Glycated haemoglobin (which reflects the average blood glucose level over the past three months) and fasting blood glucose (a short-term index) were used to determine glycaemic control, which in turn provided a complete picture.
- Missing data could lead to bias but were generally low in this study. Multiple regression analyses included a sample with missing values for the adjusted variables.
- This retrospective study was conducted using an existing database, which is primarily developed for the clinical purpose and not for research (i.e., issues with routinely collected data were present).
- As this was a cross-sectional study, it was not possible to determine the causal association between different variables and glycaemic control.

## Introduction

China has the world's largest type 2 diabetes (T2DM) epidemic, a complex metabolic disorder which has major health, social and economic consequences. Almost 11% of all adults (about 110 million) are currently living with T2DM i.e., one in nine adults has T2DM. This number is expected to increase to 151 million by 2040 [1]. Its chronic hyperglycaemia is associated with long-term complications (e.g., cardiovascular disease) and even death [2]. In China, T2DM and its complications contribute to almost one million deaths each year. Alarming, nearly 40% of these deaths are premature (i.e., in people below the age of 70) [3]. China spends upwards of US \$25 billion a year on the management of T2DM and 13% of its medical expenditures are directly caused by T2DM [4]. In spite of this, many T2DM patients have poor glycaemic control (51-68%) [5-9]. Unfortunately, these figures are much higher as compared to many developed countries [10, 11].

Ningbo is one of the most economically developed Chinese cities, located in the northeast Zhejiang province. In 2015, the prevalence of T2DM in people over 40 years of age in Ningbo city area was around 21% [12]. Ningbo First Hospital, with 1600 beds, is a general teaching hospital and one of the largest healthcare providers in the province. Annually, around two million patients visit this hospital, from local as well as from surrounding areas [13]. The hospital has a tertiary care Diabetes Centre. A team of qualified and experienced diabetes experts is working at the Diabetes Centre. Till date, no research has been conducted to explore glycaemic control in T2DM patients at the Diabetes Centre. The aim of the study was to assess their glycaemic control and to determine factors that independently predict their glycaemic control. Knowledge of factors associated with the poor glycaemic control in these patients would provide valuable information about strategies that healthcare professionals and providers can address to improve their glycaemic control.

## Methods

### *Study design, data source and period*

A retrospective cross-sectional study was conducted using an existing computerised medical records database, the Diabetes Information Management System. This

1  
2  
3 database was developed by the Yinal Software Corporation, China for the Diabetes  
4 Centre. The study period was from 1<sup>st</sup> July 2012 to 30 June 2017 (5 years) and the  
5 database included 6699 patients.  
6  
7

### 8 9 *Study population, inclusion and exclusion criteria*

10  
11  
12 The study included adult (18 years of age or older) patients, diagnosed with T2DM,  
13 and registered and received treatment at the Diabetes Centre for at least six  
14 consecutive months. Those diagnosed with type 1 diabetes, gestational diabetes,  
15 secondary diabetes, unknown type of diabetes or endocrine diseases (such as  
16 Cushing syndrome and hyperthyroidism which may increase their blood glucose  
17 levels) were excluded from the study. The study inclusion criteria were satisfied by  
18 1387 patients.  
19  
20  
21  
22  
23  
24

### 25 *Study variables*

26  
27  
28 The following variables were extracted from the database: age (in years), sex (male  
29 or female), education (university/college, class 7 to 12, class 1 to 6, or no  
30 qualifications), occupation (manual workers (i.e., more physical than mental work),  
31 non-manual workers (i.e., more mental than physical work) or never worked/retired),  
32 marital status (married or single/divorced/widowed), residence (urban or rural based  
33 on the “hukou” system (i.e., residence registration system in China)) [14], health  
34 insurance, smoking (current status), alcohol drinking (current status), family history  
35 of T2DM (any parent or sibling), duration of T2DM (in years), number of visits to the  
36 Diabetes Centre for T2DM since registration, T2DM therapeutic regimen (only diet  
37 and physical activity; diet and physical activity and oral hypoglycaemic drugs (OHD -  
38 metformin, acarbose, sulfonylureas, meglitinides and/or thiazolidinediones); diet and  
39 physical activity and insulin (long-term insulin, intermediate insulin, rapid-acting  
40 insulin and/or premix insulin); or diet and physical activity, OHD and insulin),  
41 comorbidities ((overweight or obese (diagnosis based on body mass index (BMI)  
42  $\geq 24$  kg/m<sup>2</sup>) [15], hypertension (diagnosis based on blood pressure  $\geq 140/90$  mm  
43 Hg), and hyperlipidemia (diagnosis based on serum lipids- total cholesterol  $\geq 4.5$   
44 mmol/L or triglycerides  $\geq 1.7$  mmol/L), and blood glucose levels. Poor glycaemic  
45 control was defined as glycated haemoglobin (HbA1c)  $\geq 7\%$  or fasting blood  
46  
47  
48  
49  
50  
51  
52  
53  
54  
55  
56  
57  
58

1  
2  
3 glucose (FBG) >7.0 mmol/L [16]. The HbA1c was estimated using the high-  
4 performance liquid chromatographic (HPLC) method, using the D-10 Hemoglobin  
5 Analyzer (Bio-Rad, USA). The FBG was estimated using the glucose oxidase  
6 method. It should be noted that data on dipeptidyl peptidase-4 (DPP-4) inhibitors and  
7 glucagon-like peptide 1 (GLP-1) receptor agonists were not available in the  
8 database. These drugs are not covered by the existing health insurance system in  
9 China and thus, these drugs are not sold in this hospital [17].  
10  
11  
12  
13  
14

### 15 *Ethics*

16  
17  
18  
19 The study was ethically approved by the Research Ethics Committee at the Ningbo  
20 First Hospital, China.  
21  
22

### 23 *Statistical analyses*

24  
25  
26  
27 The 5-year period prevalence of poor glycaemic control in T2DM patients at the  
28 Diabetes Centre was calculated. Simple logistic regression methods were used to  
29 investigate the association between glycaemic control and other variables. To  
30 identify any independent association, multiple logistic regression models were  
31 developed using backward stepwise regression analyses and all the other variables  
32 were included. Sensitivity analyses were carried out – only those variables with a  
33 P value of  $\leq 0.20$  in simple logistic regressions were included in multiple logistic  
34 regression models. Multiple regression models included a sample with unknown  
35 values for these adjusted variables. Odds ratios (ORs) and their respective 95%  
36 confidence intervals (CIs) were calculated. The results were considered significant  
37 when P values were  $\leq 0.05$ . All data were analysed using IBM SPSS Statistics  
38 Version 20.0 for Windows.  
39  
40  
41  
42  
43  
44  
45  
46

### 47 **Results**

48  
49  
50 57% of T2DM patients were male and the mean age was 54.1 years. In terms of  
51 HbA1c and FBG, the 5-year period prevalence of poor glycaemic control was 50.3%  
52 (n=698) and 57.3% (n=791), respectively. Table 1 reports the characteristics of  
53 T2DM patients with good and poor glycaemic control. In terms of HbA1c and FBG,  
54  
55  
56  
57  
58



glycaemic control was found to be associated with age ( $p<0.001$ ), education ( $p<0.001$ ), residence ( $p=0.012$  and  $p=0.042$ , respectively), duration of T2DM ( $p<0.001$ ) and T2DM therapeutic regimen ( $p<0.001$ ). The additional associated factors were hypertension ( $p=0.005$ ) in the case of HbA1c, and alcohol drinking ( $p=0.04$ ) and hyperlipidemia ( $p=0.025$ ) in the case of FBG.

Table 2 shows the multiple backward stepwise logistic regression analyses to determine factors independently associated with the poor glycaemic control. In terms of HbA1c and FBG, the odds of poor glycaemic control increased with the duration of T2DM ( $p<0.001$ ), were lower in patients residing in urban areas ( $p<0.001$  and  $p=0.023$ , respectively), only on diet and physical activity as part of their T2DM therapeutic regimen ( $p<0.001$  and  $p=0.003$ , respectively), and without hyperlipidemia ( $p=0.013$  and  $p=0.004$ , respectively). Table 3 reports the sensitivity analyses - multiple logistic regression models included only those variables with a P value of  $\leq 0.20$  in simple logistic regressions. Similar results were found in the sensitivity analyses. In terms of HbA1c and FBG, the odds of poor glycaemic control increased with the duration of T2DM ( $p<0.001$ ), were lower in patients residing in urban areas ( $p<0.001$  and  $p=0.046$ , respectively), only on diet and physical activity as part of their T2DM therapeutic regimen ( $p<0.001$  and  $p=0.002$ , respectively), and without hyperlipidemia ( $p=0.013$  and  $p=0.038$ , respectively).

## Discussion

In terms of HbA1c and FBG, the 5-year period prevalence of poor glycaemic control in T2DM patients at the tertiary care Diabetes Centre in Ningbo, China was 50% and 57%, respectively. In other words, less than half of T2DM patients at the Diabetes Centre have adequate glycaemic control. The finding is consistent with a recent nationwide population-based study (51%) and a recent nationwide hospital-based study (52%) [5,6]. However, two other recent nationwide hospital-based studies reported much higher figures (65% and 68%) [7,8]. These hospital-based studies included a range of hospitals with different tier levels. In terms of glycaemic control in T2DM patients, tertiary care hospitals usually perform better as compared to primary or secondary care hospitals [18], and this could be the case in our study. Another reason could be different population characteristics in these studies. For example,

1  
2  
3 the study which reported 68% included only those T2DM patients who were on  
4 OHDs alone or in combination with either insulin or GLP-1 receptor agonists,  
5 indicating poor glycaemic control with the disease progression. In spite of the  
6 availability of diabetes experts at this tertiary care Diabetes Centre and of effective  
7 and safe glucose-lowering therapies, the prevalence of poor glycaemic control in  
8 T2DM patients was high in our study as compared to other studies conducted in  
9 various developed countries [10,11]. This indicates that there is still a room for  
10 improvement at this Diabetes Centre.  
11  
12  
13  
14  
15

16  
17 In the unadjusted models (HbA1c and FBG), glycaemic control was found to be  
18 associated with age, education, residence, duration of T2DM and T2DM therapeutic  
19 regimen. The additional associated factors were hypertension in the case of HbA1c,  
20 and alcohol drinking and hyperlipidemia in the case of FBG. Previous studies  
21 conducted among T2DM patients in various countries reported similar and other  
22 factors associated with glycaemic control (such as age, sex, education, alcohol  
23 drinking, duration of T2DM, T2DM therapeutic regimen, overweight or obese,  
24 hypertension and hyperlipidemia) [7,18-24].  
25  
26  
27  
28  
29  
30

31  
32 In terms of HbA1c and FBG, the odds of poor glycaemic control increased with the  
33 duration of T2DM, were lower in patients residing in urban areas, only on diet and  
34 physical activity as part of their T2DM therapeutic regimen, and without  
35 hyperlipidemia. Similar results were found in the sensitivity analyses. The  
36 association found between poor glycaemic control and longer duration of T2DM is  
37 consistent with previous studies [8,19,24-26]. Since T2DM is a progressive disease,  
38 the function and mass of  $\beta$ -cells gradually decline with the disease progression [27].  
39 In order to attain glycaemic control, a stepwise approach has been recommended in  
40 the national T2DM management guideline [16]. The first and foremost step should be  
41 lifestyle modification (i.e., diet and physical activity), followed by addition of OHD(s)  
42 and/or insulin(s) with the disease progression. An association was found between  
43 poor glycaemic control and addition of OHD(s) and/or insulin(s), and the finding is  
44 consistent with previous studies [24,28]. This relationship more likely represents a  
45 marker of T2DM chronicity and severity than of medication effects themselves.  
46 Another reason could be the failure of clinicians to intensify therapy in a timely  
47 manner [29,30]. The uptake and adherence to the T2DM therapeutic regimen among  
48  
49  
50  
51  
52  
53  
54  
55  
56  
57  
58

1  
2  
3 patients could also be different from what was prescribed [23,30]. A recent study  
4 showed that only 43% of T2DM patients adhered to their therapeutic regimen  
5 (OHD(s) and/or insulin(s)) in China [31]. Thus, these issues should be explored and  
6 be taken into consideration in future studies.  
7  
8

9  
10  
11 The “hukou” system was used to classify T2DM patients into urban or rural residents.  
12 An association was found between poor glycaemic control and rural residents, which  
13 indicates health inequalities in T2DM management. This finding is consistent with  
14 another recently conducted study in China [5]. In addition to poor socioeconomic  
15 conditions of rural residents in China, no or delayed access to healthcare is a major  
16 issue in rural areas [32]. Even the health insurance system is different in rural and  
17 urban areas [33-35]. There are discrepancies in resource allocation between rural  
18 and urban areas. All these could explain the association found between poor  
19 glycaemic control and rural residents.  
20  
21  
22  
23  
24  
25

26  
27 Like T2DM, hyperlipidemia is a risk factor for cardiovascular disease [36]. The  
28 association found between poor glycaemic control and hyperlipidemia is consistent  
29 with previous studies [24,37]. Glycaemic control mainly depends on the degree of  
30 residual pancreatic  $\beta$ -cells function and insulin sensitivity [38,39]. Abnormalities in  
31 lipid metabolism, characterised by an increase in serum lipids (total cholesterol and  
32 triglycerides), may result in lipid spill over to non-adipose tissues, such as pancreatic  
33  $\beta$ -cells. This may lead to cellular dysfunction and lipoapoptosis [40,41]. It is also  
34 accepted that high serum triglyceride level is associated with insulin resistance [42].  
35 These mechanisms may partly explain the association found between poor  
36 glycaemic control and hyperlipidemia. Further research needs to be conducted to  
37 confirm the role of hyperlipidemia in long-term glycaemic control. In continuation,  
38 early initiation of lipid-lowering therapy in T2DM patients may reduce the risk for  
39 cardiovascular disease and may have benefits in terms of their long-term glycaemic  
40 control.  
41  
42  
43  
44  
45  
46  
47  
48  
49

50  
51 The study has a number of strengths and weaknesses. This is the first study to  
52 explore glycaemic control in T2DM patients at the tertiary care Diabetes Centre in  
53 Ningbo, China. In addition, as far as we are aware, this is the first study on this issue  
54 in the Zhejiang province of China. HbA1c and FBG were used to determine  
55  
56  
57  
58

1  
2  
3 glycaemic control, which in turn provided a complete picture. HbA1c reflects the  
4 average blood glucose level over the past three months. On the other hand, FBG is  
5 a short-term index. In terms of generalisability, the study findings could be valid in  
6 settings with similar populations and healthcare systems. Missing data could lead to  
7 bias but were generally low in this study. Multiple regression analyses included a  
8 sample with missing values for the adjusted variables. This retrospective study was  
9 conducted using an existing database, which is primarily developed for the clinical  
10 purpose and not for research. It is possible that our findings were the result of other  
11 factors not present in the database and thus, not adjusted for in the models, such as  
12 self-monitoring of blood glucose, uptake and adherence to the T2DM therapeutic  
13 regimen, and depression, anxiety and stress levels of patients [23,43,44]. Although  
14 the data were available on time, however, the other data quality issues of routinely  
15 collected data cannot be ignored, such as accuracy and reliability. Some of the data  
16 were self-reported and this could have been an issue. As this was a cross-sectional  
17 study, it was not possible to determine the causal association between different  
18 variables and glycaemic control. A long-term, longitudinal study should be conducted  
19 among these patients to assess the impact of various factors (these as well as other  
20 potential factors) on their glycaemic control. Ours was a hospital-based study and a  
21 population-based study should be conducted, which might give a different picture.  
22 This could be because of different population characteristics, including their  
23 healthcare-seeking behavior.

24  
25  
26  
27  
28  
29  
30  
31  
32  
33  
34  
35  
36  
37  
38 In conclusion, more than half of T2DM patients at the Diabetes Centre in Ningbo,  
39 China have poor glycaemic control, and the predictors of glycaemic control were  
40 identified. The study findings could be taken into consideration in future  
41 interventional studies aimed at improving glycaemic control in these patients.  
42  
43  
44  
45  
46  
47  
48  
49  
50  
51  
52  
53  
54  
55  
56  
57  
58

### **Authors' contributions**

JL and KC designed the study, analysed the data and wrote the first draft of the manuscript. All the authors revised this for important intellectual content and approved the final manuscript.

### **Competing interests**

The authors declare that they have no competing interests.

### **Ethics approval and consent to participate**

The study used an existing computerised medical records database, the Diabetes Information Management System. The study was ethically approved by the Research Ethics Committee at the Ningbo First Hospital, China.

### **Data sharing**

The study is part of a bigger project and further publications are expected from the dataset which prevents us from making it public right now.

### **Funding**

The study was supported by the Natural Science Foundation of Ningbo Municipality (CN) (Grant No. 2016A610169).

### **Acknowledgements**

The authors thank Yida Li (Yinal Software Corporation) for the management and organisation of original data and the patients.

## References

1. International Diabetes Federation. IDF diabetes atlas. 7th edition. Brussels, Belgium. 2015.
2. LeRoith D, Rayfield EJ. The benefits of tight glycaemic control in type 2 diabetes mellitus. *Clin Cornerstone*. 2007; 8:S19-29.
3. World Health Organization. Rate of diabetes in China “explosive”. <http://www.wpro.who.int/china/mediacentre/releases/2016/20160406/en/> Accessed 23 August 2017.
4. Cheng TO. Diabetes epidemic in China and its economic impact. *Int J Cardiol*. 2011; 149:1-3.
5. Wang L, Gao P, Zhang M, Huang Z, Zhang D, Deng Q, Li Y, Zhao Z, Qin X, Jin D, Zhou M, Tang X, Hu Y, Wang L. Prevalence and ethnic pattern of diabetes and prediabetes in China in 2013. *JAMA*. 2017; 317:2515-23.
6. Ji L, Hu D, Pan C, Weng J, Huo Y, Ma C, Mu Y, Hao C, Ji Q, Ran X, Su B, Zhuo H, Fox KA, Weber M, Zhang D, CCMR Advisory Board, CCMR-3B Study Investigators. Primacy of the 3B approach to control risk factors for cardiovascular disease in type 2 diabetes patients. *Am J Med*. 2013; 126:925.e11-22.
7. Liu L, Lou Q, Guo X, Yuan L, Shen L, Sun Z, Zhao F, Dai X, Huang J, Yang H, Mordes JP, Chinese Diabetes Education Status Survey Study Group. Management status and its predictive factors in patients with type 2 diabetes in China: a nationwide multicenter study. *Diabetes Metab Res Rev*. 2015; 31:811-6.
8. Ji LN, Lu JM, Guo XH, Yang WY, Weng JP, Jia WP, Zou DJ, Zhou ZG, Yu DM, Liu J, Shan ZY, Yang YZ, Hu RM, Zhu DL, Yang LY, Chen L, Zhao ZG, Li QF, Tian HM, Ji QH, Liu J, Ge JP, Shi LX, Xu YC. Glycaemic control among patients in China with type 2 diabetes mellitus receiving oral drugs or injectables. *BMC Public Health*. 2013; 13:602.
9. Xu Y, Wang L, He J, Bi Y, Li M, Wang T, Wang L, Jiang Y, Dai M, Lu J, Xu M, Li Y, Hu N, Li J, Mi S, Chen CS, Li G, Mu Y, Zhao J, Kong L, Chen J, Lai S, Wang W, Zhao W, Ning G, 2010 China Noncommunicable Disease Surveillance Group. Prevalence and control of diabetes in Chinese adults. *JAMA*. 2013; 310:948-59.

10. Lipska KJ, Yao X, Herrin J, McCoy RG, Ross JS, Steinman MA, Inzucchi SE, Gill TM, Krumholz HM, Shah ND. Trends in drug utilization, glycemic control, and rates of severe hypoglycemia, 2006-2013. *Diabetes Care*. 2017; 40:468-75.
11. Cheung BM, Ong KL, Cherny SS, Sham PC, Tso AW, Lam KS. Diabetes prevalence and therapeutic target achievement in the United States, 1999 to 2006. *Am J Med*. 2009; 122: 443-53.
12. Yao DZ, Sun XH, Li JH, Guo WY. Prevalence and risk factors of diabetes in people over 40 years of age in Ningbo city area. *Modern Practical Medicine*. 2016; 28:1343-5.
13. The Public Health Service Platform of Ningbo. Ningbo First Hospital. <http://gzjk.nbws.gov.cn/f/mech?mechId=121> Accessed on 14 August 2017.
14. The National People's Congress of the People's Republic of China. Regulations of the People's Republic of China on Residence Registration. [http://www.npc.gov.cn/wxzl/gongbao/2000-12/10/content\\_5004332.htm](http://www.npc.gov.cn/wxzl/gongbao/2000-12/10/content_5004332.htm). Accessed 23 August 2017.
15. Chinese Society of Endocrinology. Expert consensus on management of type 2 diabetes mellitus with obesity in Chinese. *Chin J Endocrinol Metab*. 2016; 32:623-7.
16. Chinese Diabetes Society. China guideline for type 2 diabetes (2013 ed). *Chin J Endocrinol Metab*. 2014; 30:893-942.
17. Ningbo Municipal Human Resources and Social Security Bureau. Catalogue of drugs for basic medical insurance. <http://www.zjnb.lss.gov.cn/cx/cxzx/ybxx/ybyp/ypmu/#Menu=1312>. Accessed 23 August 2017.
18. Bi Y, Zhu D, Cheng J, Zhu Y, Xu N, Cui S, Li W, Cheng X, Wang F, Hu Y, Shen S, Weng J. The status of glycemic control: a cross-sectional study of outpatients with type 2 diabetes mellitus across primary, secondary, and tertiary hospitals in the Jiangsu province of China. *Clin Ther*. 2010; 32:973-83.
19. Chan JC, Gagliardino JJ, Baik SH, Chantelot JM, Ferreira SR, Hancu N, Ilkova H, Ramachandran A, Aschner P, IDMPS Investigators. Multifaceted determinants for achieving glycemic control: the international diabetes management practice study (IDMPS). *Diabetes Care*. 2009; 32:227-33.



- 1  
2  
3 20. Shan S, Gu L, Lou Q, Ouyang X, Yu Y, Wu H, Bian R. Evaluation of glycemc  
4 control in patients with type 2 diabetes mellitus in Chinese communities: a cross-  
5 sectional study. *Clin Exp Med*. 2017; 17:79-84.  
6
- 7  
8 21. Shani M, Taylor TR, Vinker S, Lustman A, Erez R, Elhayany A, Lahad A.  
9 Characteristics of diabetics with poor glycemc control who achieve good control.  
10 *J Am Board Fam Med*. 2008; 21:490-6.  
11
- 12  
13 22. Roy S, Sherman A, Monari-Sparks MJ, Schweiker O, Jain N, Sims E, Breda M,  
14 Byraiah GP, Belecanech RG, Coletta MD, Barrios CJ, Hunter K, Gaughan JP.  
15 Association of comorbid and metabolic factors with optimal control of type 2  
16 diabetes mellitus. *N Am J Med Sci*. 2016; 8:31-9.  
17
- 18  
19 23. Kamuhabwa AR, Charles E. Predictors of poor glycemc control in type 2 diabetic  
20 patients attending public hospitals in Dar es Salaam. *Drug Healthc Patient Saf*.  
21 2014; 6:155-65.  
22
- 23  
24 24. Sazlina SG, Mastura I, Cheong AT, Bujang Mohamad A, Jamaiyah H, Lee PY,  
25 Syed Alwi SA, Chew BH. Predictors of poor glycaemic control in older patients  
26 with type 2 diabetes mellitus. *Singapore Med J*. 2015; 56:284-90.  
27
- 28  
29 25. Li MZ, Ji LN, Meng ZL, Guo XH, Yang JK, Lu JM, Lü XF, Hong X. Management  
30 status of type 2 diabetes mellitus in tertiary hospitals in Beijing: gap between  
31 guideline and reality. *Chin Med J (Engl)*. 2012; 125:4185-9.  
32
- 33  
34 26. Khattab M, Khader YS, Al-Khawaldeh A, Ajlouni K. Factors associated with poor  
35 glycemc control among patients with type 2 diabetes. *J Diabetes Complications*.  
36 2010; 24:84-9.  
37
- 38  
39 27. UK Prospective Diabetes Study Group. UK prospective diabetes study 16.  
40 Overview of 6 years' therapy of type II diabetes: a progressive disease. *Diabetes*.  
41 1995; 44:1249-58.  
42
- 43  
44 28. Chiu CJ, Wray LA. Factors predicting glycemc control in middle-aged and older  
45 adults with type 2 diabetes. *Prev Chronic Dis*. 2010; 7:A08.  
46
- 47  
48 29. Ji L, Zhang P, Weng J, Lu J, Guo X, Jia W, Yang W, Zou D, Zhou Z, Pan C, Gao  
49 Y, Li X, Zhu D, Li Y, Wu Y, Garg SK. Observational registry of basal insulin  
50 treatment (ORBIT) in patients with type 2 diabetes uncontrolled by oral  
51 hypoglycemc agents in China: study design and baseline characteristics.  
52 *Diabetes Technol Ther*. 2015; 17:735-44.  
53
- 54  
55 30. Ross SA. Breaking down patient and physician barriers to optimize glycemc  
56 control in type 2 diabetes. *Am J Med*. 2013; 126:S38-48.  
57



- 1  
2  
3 31. Le C, Rong S, Dingyun Y, Wenlong C. Socioeconomic disparities in type 2  
4 diabetes mellitus prevalence and self-management behaviors in rural southwest  
5 China. *Diabetes Res Clin Pract.* 2016; 121:9-16.  
6
- 7  
8 32. Syed ST, Gerber BS, Sharp LK. Traveling towards disease: transportation  
9 barriers to health care access. *J Community Health.* 2013; 38:976-93.  
10
- 11 33. Yip WC, Hsiao WC, Chen W, Hu S, Ma J, Maynard A. Early appraisal of China's  
12 huge and complex health-care reforms. *Lancet.* 2012; 379:833-42.  
13
- 14 34. Dong KY. Medical insurance system evolution in China. *China Economic Review.*  
15 2009; 20:591-7.  
16
- 17 35. Liu X, Wong H, Liu K. Outcome-based health equity across different social health  
18 insurance schemes for the elderly in China. *BMC Health Serv Res.* 2016. 16:9.  
19
- 20 36. Nelson RH. Hyperlipidemia as a risk factor for cardiovascular disease. *Prim Care.*  
21 2013; 40:195-211.  
22
- 23 37. Zhang SL, Chen ZC, Yan L, Chen LH, Cheng H, Ji LN. Determinants for  
24 inadequate glycaemic control in Chinese patients with mild-to-moderate type 2  
25 diabetes on oral antidiabetic drugs alone. *Chin Med J (Engl).* 2011; 124:2461-8.  
26
- 27 38. Dansuntornwong B, Chanprasertyothin S, Jongjaroenprasert W, Ngarmukos C,  
28 Bunnag P, Puavilai G, Ongphiphadhanakul B. The relation between parameters  
29 from homeostasis model assessment and glycemic control in type 2 diabetes. *J*  
30 *Med Assoc Thai.* 2007; 90:2284-90.  
31
- 32 39. TODAY Study Group. Effects of metformin, metformin plus rosiglitazone, and  
33 metformin plus lifestyle on insulin sensitivity and  $\beta$ -cell function in TODAY.  
34 *Diabetes Care.* 2013; 36:1749-57.  
35
- 36 40. Kusminski CM, Shetty S, Orzi L, Unger RH, Scherer PE. Diabetes and apoptosis:  
37 lipotoxicity. *Apoptosis.* 2009; 14:1484-95.  
38
- 39 41. Irace C, Tripolino C, Carallo C, Scavelli FB, Valle ED, Cortese C, Gnasso A.  
40 Clinical predictors of progressive beta-cell failure in type 2 diabetes. *J Investig*  
41 *Med.* 2015; 63:802-5.  
42
- 43 42. Li N, Fu J, Koonen DP, Kuivenhoven JA, Snieder H, Hofker MH. Are  
44 hypertriglyceridemia and low HDL causal factors in the development of insulin  
45 resistance? *Atherosclerosis.* 2014; 233:130-8.  
46
- 47 43. Gorska-Ciebiada M, Ciebiada M. Predictors of poor glycaemic control in type 2  
48 diabetic elderly patients with depressive syndrome. *Psychogeriatrics.* 2017; 7.  
49  
50  
51  
52  
53  
54  
55  
56  
57  
58

- 1  
2  
3 44. Anderson RJ, Grigsby AB, Freedland KE, de Groot M, McGill JB, Clouse RE,  
4 Lustman PJ. Anxiety and poor glycemic control: a meta-analytic review of the  
5 literature. *Int J Psychiatry Med.* 2002; 32:235-47.  
6  
7  
8  
9  
10  
11  
12  
13  
14  
15  
16  
17  
18  
19  
20  
21  
22  
23  
24  
25  
26  
27  
28  
29  
30  
31  
32  
33  
34  
35  
36  
37  
38  
39  
40  
41  
42  
43  
44  
45  
46  
47  
48  
49  
50  
51  
52  
53  
54  
55  
56  
57  
58  
59  
60

For peer review only

Table 1 Characteristics of T2DM patients with good and poor glycaemic control

|                         | <b>Good glycaemic control<br/>HbA1c&lt;7%<br/>(n=689)</b> | <b>Poor glycaemic control<br/>HbA1c&gt;=7%<br/>(n=698)</b> | <b>P value</b> | <b>Good glycaemic control<br/>FBG≤7.0<br/>mmol/L<br/>(n=596)</b> | <b>Poor glycaemic control<br/>FBG&gt;7.0<br/>mmol/L<br/>(n=791)</b> | <b>P value</b> |
|-------------------------|-----------------------------------------------------------|------------------------------------------------------------|----------------|------------------------------------------------------------------|---------------------------------------------------------------------|----------------|
| <b>Age</b>              | 51.1±14.4*                                                | 57.2±14.3*                                                 | <0.001         | 52.5±15.2*                                                       | 55.4±14.1*                                                          | <0.001         |
| <b>Sex</b>              |                                                           |                                                            | 0.157          |                                                                  |                                                                     | 0.83           |
| Male                    | 405 (58.8)                                                | 384 (55.0)                                                 |                | 341 (57.2)                                                       | 448 (56.6)                                                          |                |
| Female                  | 284 (41.2)                                                | 314 (45.0)                                                 |                | 255 (42.8)                                                       | 343 (43.4)                                                          |                |
| <b>Education</b>        |                                                           |                                                            | <0.001         |                                                                  |                                                                     | <0.001         |
| University/college      | 166 (24.1)                                                | 102 (14.6)                                                 |                | 145 (24.3)                                                       | 123 (15.5)                                                          |                |
| Class 7-12              | 333 (48.3)                                                | 310 (44.4)                                                 |                | 268 (45.0)                                                       | 375 (47.4)                                                          |                |
| Class 1-6               | 122 (17.7)                                                | 204 (29.2)                                                 |                | 117 (19.6)                                                       | 209 (26.4)                                                          |                |
| No qualifications       | 35 (5.1)                                                  | 67 (9.6)                                                   |                | 45 (7.6)                                                         | 57 (7.2)                                                            |                |
| Unknown                 | 33 (4.8)                                                  | 15 (2.1)                                                   |                | 21 (3.5)                                                         | 27 (3.4)                                                            |                |
| <b>Occupation</b>       |                                                           |                                                            | 0.064          |                                                                  |                                                                     | 0.231          |
| Manual workers          | 94 (13.6)                                                 | 121 (17.3)                                                 |                | 87 (14.6)                                                        | 128 (16.2)                                                          |                |
| Non-manual workers      | 138 (20.0)                                                | 141 (20.2)                                                 |                | 127 (21.3)                                                       | 152 (19.2)                                                          |                |
| Never worked/Retired    | 219 (31.8)                                                | 317 (45.4)                                                 |                | 211 (35.4)                                                       | 325 (41.1)                                                          |                |
| Unknown                 | 238 (34.5)                                                | 119 (17.0)                                                 |                | 171 (28.7)                                                       | 186 (23.5)                                                          |                |
| <b>Marital status</b>   |                                                           |                                                            | 0.2            |                                                                  |                                                                     | 0.312          |
| Married                 | 510 (74.0)                                                | 562 (80.5)                                                 |                | 446 (74.8)                                                       | 626 (79.1)                                                          |                |
| Single/divorced/widowed | 55 (8.0)                                                  | 77 (11.0)                                                  |                | 61 (10.2)                                                        | 71 (9.0)                                                            |                |
| Unknown                 | 124 (18.0)                                                | 59 (8.5)                                                   |                | 89 (14.9)                                                        | 94 (11.9)                                                           |                |
| <b>Residence</b>        |                                                           |                                                            | 0.012          |                                                                  |                                                                     | 0.042          |
| Urban                   | 449 (65.2)                                                | 412 (59.0)                                                 |                | 388 (65.1)                                                       | 473 (59.8)                                                          |                |
| Rural                   | 231 (33.5)                                                | 281 (40.3)                                                 |                | 202 (33.9)                                                       | 310 (39.2)                                                          |                |
| Unknown                 | 9 (1.3)                                                   | 5 (0.7)                                                    |                | 6 (1.0)                                                          | 8 (1.0)                                                             |                |

|                                                                            |                                            |            |            |        |            |            |        |
|----------------------------------------------------------------------------|--------------------------------------------|------------|------------|--------|------------|------------|--------|
| <b>Health insurance</b>                                                    |                                            |            |            | 0.583  |            |            | 0.704  |
|                                                                            | Yes                                        | 641 (93.0) | 644 (92.3) |        | 554 (93.0) | 731 (92.4) |        |
|                                                                            | No                                         | 48 (7.0)   | 54 (7.7)   |        | 42 (7.0)   | 60 (7.6)   |        |
| <b>Smoking</b>                                                             |                                            |            |            | 0.076  |            |            | 0.505  |
|                                                                            | No                                         | 567 (82.3) | 548 (78.5) |        | 484 (81.2) | 631 (79.8) |        |
|                                                                            | Yes                                        | 122 (17.7) | 150 (21.5) |        | 112 (18.8) | 160 (20.2) |        |
| <b>Alcohol drinking</b>                                                    |                                            |            |            | 0.182  |            |            | 0.04   |
|                                                                            | No                                         | 617 (89.6) | 609 (87.2) |        | 539 (90.4) | 687 (86.9) |        |
|                                                                            | Yes                                        | 72 (10.4)  | 89 (12.8)  |        | 57 (9.6)   | 104 (13.1) |        |
| <b>Family history of T2DM</b>                                              |                                            |            |            | 0.604  |            |            | 0.095  |
|                                                                            | No                                         | 429 (62.3) | 444 (63.6) |        | 390 (65.4) | 483 (61.1) |        |
|                                                                            | Yes                                        | 260 (37.7) | 254 (36.4) |        | 206 (34.6) | 308 (38.9) |        |
| <b>Duration of T2DM</b>                                                    |                                            | 4 (1,8)**  | 9 (4,14)** | <0.001 | 4 (1,10)** | 7 (3,12)** | <0.001 |
|                                                                            | Unknown                                    | 42 (6.1)   | 14 (2.0)   |        | 40 (6.7)   | 16 (2.0)   |        |
| <b>Number of visits to the Diabetes Centre for T2DM since registration</b> |                                            | 8 (4,13)** | 8 (5,13)** | 0.335  | 8 (4,13)** | 8 (5,13)** | 0.214  |
| <b>T2DM therapeutic regimen</b>                                            |                                            |            |            | <0.001 |            |            | <0.001 |
|                                                                            | Only diet and physical activity            | 99 (14.4)  | 45 (6.4)   |        | 92 (15.4)  | 52 (6.6)   |        |
|                                                                            | Diet and physical activity + OHD           | 335 (48.6) | 296 (42.4) |        | 267 (44.8) | 364 (46.0) |        |
|                                                                            | Diet and physical activity + insulin       | 38 (5.5)   | 27 (3.9)   |        | 31 (5.2)   | 34 (4.3)   |        |
|                                                                            | Diet and physical activity + OHD + insulin | 217 (31.5) | 330 (47.3) |        | 206 (34.6) | 341 (43.1) |        |
| <b>Overweight or obese</b>                                                 |                                            |            |            | 0.357  |            |            | 0.705  |
|                                                                            | No                                         | 311 (45.1) | 303 (43.4) |        | 260 (43.6) | 354 (44.8) |        |
|                                                                            | Yes                                        | 345 (50.1) | 372 (53.3) |        | 311 (52.2) | 406 (51.3) |        |
|                                                                            | Unknown                                    | 33 (4.8)   | 23 (3.3)   |        | 25 (4.2)   | 31 (3.9)   |        |
| <b>Hypertension</b>                                                        |                                            |            |            | 0.005  |            |            | 0.847  |
|                                                                            | No                                         | 321 (46.6) | 273 (39.1) |        | 257 (43.1) | 337 (42.6) |        |

|                       |     |            |            |       |            |            |       |
|-----------------------|-----|------------|------------|-------|------------|------------|-------|
|                       | Yes | 368 (53.4) | 425 (60.9) |       | 339 (56.9) | 454 (57.4) |       |
| <b>Hyperlipidemia</b> |     |            |            | 0.051 |            |            | 0.025 |
|                       | No  | 164 (23.8) | 136 (19.5) |       | 146 (24.5) | 154 (19.5) |       |
|                       | Yes | 525 (76.2) | 562 (80.5) |       | 450 (75.5) | 637 (80.5) |       |

n(%), P value excludes unknown.

\*Mean (standard deviation (SD)).

\*\*Median (interquartile range (IQR)).

Table 2 Logistic regression analyses to determine factors independently associated with poor glycaemic control

|                                                                            | OR (95% CI)         | P value |
|----------------------------------------------------------------------------|---------------------|---------|
| <b>HbA1c<math>\geq</math>7%</b>                                            |                     |         |
| <b>Residence</b>                                                           |                     | <0.001  |
| Urban                                                                      | 1                   |         |
| Rural                                                                      | 1.66 (1.23 to 2.25) |         |
| <b>Duration of T2DM</b>                                                    | 1.13 (1.10 to 1.16) | <0.001  |
| <b>Number of visits to the Diabetes Centre for T2DM since registration</b> | 0.98 (0.97 to 1.00) | 0.087   |
| <b>T2DM therapeutic regimen</b>                                            |                     | <0.001  |
| Only diet and physical activity                                            | 1                   |         |
| Diet and physical activity + OHD                                           | 2.07 (1.14 to 3.77) |         |
| Diet and physical activity + insulin                                       | 1.08 (0.46 to 2.54) |         |
| Diet and physical activity + OHD + insulin                                 | 2.67 (1.47 to 4.85) |         |
| <b>Hyperlipidemia</b>                                                      |                     | 0.013   |
| No                                                                         | 1                   |         |
| Yes                                                                        | 1.53 (1.10 to 2.14) |         |
| <b>FBG&gt;7mmol/L</b>                                                      |                     |         |
| <b>Residence</b>                                                           |                     | 0.023   |
| Urban                                                                      | 1                   |         |
| Rural                                                                      | 1.40 (1.05 to 1.87) |         |
| <b>Duration of T2DM</b>                                                    | 1.05 (1.03 to 1.07) | <0.001  |

|                                            |  |                     |       |
|--------------------------------------------|--|---------------------|-------|
| <b>T2DM therapeutic regimen</b>            |  |                     | 0.003 |
| Only diet and physical activity            |  | 1                   |       |
| Diet and physical activity + OHD           |  | 2.64 (1.50 to 4.66) |       |
| Diet and physical activity + insulin       |  | 2.11 (0.94 to 4.76) |       |
| Diet and physical activity + OHD + insulin |  | 2.90 (1.65 to 5.10) |       |
| <b>Hyperlipidemia</b>                      |  |                     | 0.004 |
| No                                         |  | 1                   |       |
| Yes                                        |  | 1.60 (1.16 to 2.20) |       |
| <b>Hypertension</b>                        |  |                     | 0.08  |
| No                                         |  | 1                   |       |
| Yes                                        |  | 0.77 (0.57 to 1.03) |       |

Table 3 Sensitivity analyses: multiple logistic regression models included those variables with  $P \leq 0.20$  in simple logistic regressions

|                                            |  | <b>OR (95% CI)</b>  | <b>P value</b> |
|--------------------------------------------|--|---------------------|----------------|
| <b>HbA1c<math>\geq</math>7%</b>            |  |                     |                |
| <b>Residence</b>                           |  |                     | <0.001         |
| Urban                                      |  | 1                   |                |
| Rural                                      |  | 1.68 (1.24 to 2.27) |                |
| <b>Duration of T2DM</b>                    |  | 1.13 (1.10 to 1.15) | <0.001         |
| <b>T2DM therapeutic regimen</b>            |  |                     | <0.001         |
| Only diet and physical activity            |  | 1                   |                |
| Diet and physical activity + OHD           |  | 2.09 (1.16 to 3.76) |                |
| Diet and physical activity + insulin       |  | 1.07 (0.46 to 2.49) |                |
| Diet and physical activity + OHD + insulin |  | 2.61 (1.46 to 4.68) |                |
| <b>Hyperlipidemia</b>                      |  |                     | 0.013          |
| No                                         |  | 1                   |                |
| Yes                                        |  | 1.53 (1.09 to 2.14) |                |
| <b>FBG&gt;7mmol/L</b>                      |  |                     |                |
| <b>Residence</b>                           |  |                     | 0.046          |
| Urban                                      |  | 1                   |                |

1  
2  
3  
4  
5  
6  
7  
8  
9  
10  
11  
12  
13  
14  
15  
16  
17  
18  
19  
20  
21  
22  
23  
24  
25  
26  
27  
28  
29  
30  
31  
32  
33  
34  
35  
36  
37  
38  
39  
40  
41  
42  
43  
44  
45  
46  
47

|                                 |                                            |                     |        |
|---------------------------------|--------------------------------------------|---------------------|--------|
|                                 | Rural                                      | 1.27 (1.01 to 1.61) |        |
| <b>Duration of T2DM</b>         |                                            | 1.05 (1.03 to 1.06) | <0.001 |
| <b>T2DM therapeutic regimen</b> |                                            |                     | 0.002  |
|                                 | Only diet and physical activity            | 1                   |        |
|                                 | Diet and physical activity + OHD           | 1.98 (1.31 to 3.00) |        |
|                                 | Diet and physical activity + insulin       | 1.70 (0.89 to 3.24) |        |
|                                 | Diet and physical activity + OHD + insulin | 2.29 (1.50 to 3.49) |        |
| <b>Hyperlipidemia</b>           |                                            |                     | 0.038  |
|                                 | No                                         | 1                   |        |
|                                 | Yes                                        | 1.34 (1.02 to 1.76) |        |
| <b>Alcohol drinking</b>         |                                            |                     | 0.098  |
|                                 | No                                         | 1                   |        |
|                                 | Yes                                        | 1.35 (0.95 to 1.91) |        |

**STROBE 2007 (v4) Statement—Checklist of items that should be included in reports of *cross-sectional studies***

| Section/Topic                | Item # | Recommendation                                                                                                                                                                       | Reported on page # |
|------------------------------|--------|--------------------------------------------------------------------------------------------------------------------------------------------------------------------------------------|--------------------|
| Title and abstract           | 1      | (a) Indicate the study's design with a commonly used term in the title or the abstract                                                                                               | 1,2                |
|                              |        | (b) Provide in the abstract an informative and balanced summary of what was done and what was found                                                                                  | 2                  |
| <b>Introduction</b>          |        |                                                                                                                                                                                      |                    |
| Background/rationale         | 2      | Explain the scientific background and rationale for the investigation being reported                                                                                                 | 4                  |
| Objectives                   | 3      | State specific objectives, including any prespecified hypotheses                                                                                                                     | 4                  |
| <b>Methods</b>               |        |                                                                                                                                                                                      |                    |
| Study design                 | 4      | Present key elements of study design early in the paper                                                                                                                              | 4,5                |
| Setting                      | 5      | Describe the setting, locations, and relevant dates, including periods of recruitment, exposure, follow-up, and data collection                                                      | 4,5                |
| Participants                 | 6      | (a) Give the eligibility criteria, and the sources and methods of selection of participants                                                                                          | 4,5                |
| Variables                    | 7      | Clearly define all outcomes, exposures, predictors, potential confounders, and effect modifiers. Give diagnostic criteria, if applicable                                             | 5,6                |
| Data sources/<br>measurement | 8*     | For each variable of interest, give sources of data and details of methods of assessment (measurement). Describe comparability of assessment methods if there is more than one group | 5,6                |
| Bias                         | 9      | Describe any efforts to address potential sources of bias                                                                                                                            | 5,6                |
| Study size                   | 10     | Explain how the study size was arrived at                                                                                                                                            | 4,5                |
| Quantitative variables       | 11     | Explain how quantitative variables were handled in the analyses. If applicable, describe which groupings were chosen and why                                                         | 5,6                |
| Statistical methods          | 12     | (a) Describe all statistical methods, including those used to control for confounding                                                                                                | 6                  |
|                              |        | (b) Describe any methods used to examine subgroups and interactions                                                                                                                  | n/a                |
|                              |        | (c) Explain how missing data were addressed                                                                                                                                          | 6                  |
|                              |        | (d) If applicable, describe analytical methods taking account of sampling strategy                                                                                                   | n/a                |
|                              |        | (e) Describe any sensitivity analyses                                                                                                                                                | 6                  |
| <b>Results</b>               |        |                                                                                                                                                                                      |                    |



|                          |     |                                                                                                                                                                                                              |                  |
|--------------------------|-----|--------------------------------------------------------------------------------------------------------------------------------------------------------------------------------------------------------------|------------------|
| Participants             | 13* | (a) Report numbers of individuals at each stage of study—eg numbers potentially eligible, examined for eligibility, confirmed eligible, included in the study, completing follow-up, and analysed            | 5,6              |
|                          |     | (b) Give reasons for non-participation at each stage                                                                                                                                                         | n/a              |
|                          |     | (c) Consider use of a flow diagram                                                                                                                                                                           | n/a              |
| Descriptive data         | 14* | (a) Give characteristics of study participants (eg demographic, clinical, social) and information on exposures and potential confounders                                                                     | 6, table 1       |
|                          |     | (b) Indicate number of participants with missing data for each variable of interest                                                                                                                          | table 1          |
| Outcome data             | 15* | Report numbers of outcome events or summary measures                                                                                                                                                         | 6, table 1       |
| Main results             | 16  | (a) Give unadjusted estimates and, if applicable, confounder-adjusted estimates and their precision (eg, 95% confidence interval). Make clear which confounders were adjusted for and why they were included | 6,7, table 1,2   |
|                          |     | (b) Report category boundaries when continuous variables were categorized                                                                                                                                    | 6,7, table 1,2,3 |
|                          |     | (c) If relevant, consider translating estimates of relative risk into absolute risk for a meaningful time period                                                                                             | n/a              |
| Other analyses           | 17  | Report other analyses done—eg analyses of subgroups and interactions, and sensitivity analyses                                                                                                               | 7, table 3       |
| <b>Discussion</b>        |     |                                                                                                                                                                                                              |                  |
| Key results              | 18  | Summarise key results with reference to study objectives                                                                                                                                                     | 7,8,9            |
| Limitations              | 19  | Discuss limitations of the study, taking into account sources of potential bias or imprecision. Discuss both direction and magnitude of any potential bias                                                   | 10               |
| Interpretation           | 20  | Give a cautious overall interpretation of results considering objectives, limitations, multiplicity of analyses, results from similar studies, and other relevant evidence                                   | 7,8,9            |
| Generalisability         | 21  | Discuss the generalisability (external validity) of the study results                                                                                                                                        | 10               |
| <b>Other information</b> |     |                                                                                                                                                                                                              |                  |
| Funding                  | 22  | Give the source of funding and the role of the funders for the present study and, if applicable, for the original study on which the present article is based                                                | 11               |

\*Give information separately for cases and controls in case-control studies and, if applicable, for exposed and unexposed groups in cohort and cross-sectional studies.

**Note:** An Explanation and Elaboration article discusses each checklist item and gives methodological background and published examples of transparent reporting. The STROBE checklist is best used in conjunction with this article (freely available on the Web sites of PLoS Medicine at <http://www.plosmedicine.org/>, Annals of Internal Medicine at <http://www.annals.org/>, and Epidemiology at <http://www.epidem.com/>). Information on the STROBE Initiative is available at [www.strobe-statement.org](http://www.strobe-statement.org).

# BMJ Open

## Glycaemic control in type 2 diabetes patients and its predictors: a retrospective database study at a tertiary care Diabetes Centre in Ningbo, China

|                                 |                                                                                                                                                                                                                                                                                                                                                                                                                                                                          |
|---------------------------------|--------------------------------------------------------------------------------------------------------------------------------------------------------------------------------------------------------------------------------------------------------------------------------------------------------------------------------------------------------------------------------------------------------------------------------------------------------------------------|
| Journal:                        | <i>BMJ Open</i>                                                                                                                                                                                                                                                                                                                                                                                                                                                          |
| Manuscript ID                   | bmjopen-2017-019697.R1                                                                                                                                                                                                                                                                                                                                                                                                                                                   |
| Article Type:                   | Research                                                                                                                                                                                                                                                                                                                                                                                                                                                                 |
| Date Submitted by the Author:   | 11-Dec-2017                                                                                                                                                                                                                                                                                                                                                                                                                                                              |
| Complete List of Authors:       | Li, Jialin; Department of Endocrinology and Metabolism Chattopadhyay, Kaushik; University of Nottingham School of Health Sciences, ; London School of Hygiene and Tropical Medicine, Xu, Miao; Department of Endocrinology and Metabolism Chen, Yanshu; Department of Endocrinology and Metabolism Hu, Fangfang; Department of Endocrinology and Metabolism Chu, Jianping; Department of Endocrinology and Metabolism li, li; Department of Endocrinology and Metabolism |
| <b>Primary Subject Heading</b>: | Diabetes and endocrinology                                                                                                                                                                                                                                                                                                                                                                                                                                               |
| Secondary Subject Heading:      | Epidemiology                                                                                                                                                                                                                                                                                                                                                                                                                                                             |
| Keywords:                       | Type 2 diabetes, Poor glycaemic control, China                                                                                                                                                                                                                                                                                                                                                                                                                           |
|                                 |                                                                                                                                                                                                                                                                                                                                                                                                                                                                          |

SCHOLARONE™  
Manuscripts

Only

**Title**

Glycaemic control in type 2 diabetes patients and its predictors: a retrospective database study at a tertiary care Diabetes Centre in Ningbo, China

Jialin Li\*<sup>1</sup>, Kaushik Chattopadhyay\*<sup>2</sup>, Miao Xu<sup>1</sup>, Yanshu Chen<sup>1</sup>, Fangfang Hu<sup>1</sup>, Jianping Chu<sup>1</sup>, Li Li<sup>1</sup>

<sup>1</sup> Department of Endocrinology and Metabolism, Ningbo First Hospital, Ningbo, PR China

<sup>2</sup> Division of Epidemiology and Public Health, School of Medicine, The University of Nottingham, Nottingham, UK

\* Co-first authors

Corresponding author: Dr. Li Li, Ningbo First Hospital, Liuting Street 59, Ningbo City, Zhejiang Province, PR China; Tel: +8613757426626; E-mail address: lilyningbo@163.com

## Abstract

Objectives: The aim of the study was to assess glycaemic control in type 2 diabetes (T2DM) patients at a tertiary care Diabetes Centre in Ningbo, China, and to determine factors that independently predict their glycaemic control.

Design: Retrospective cross-sectional study using an existing database, the Diabetes Information Management System.

Setting: Tertiary care Diabetes Centre in Ningbo, China.

Participants: The study included adult T2DM patients, registered and receiving treatment at the Diabetes Centre for at least six consecutive months. The study inclusion criteria were satisfied by 1387 patients, from 1 July 2012 to 30 June 2017.

Primary outcome measure: Glycaemic control (poor was defined as glycated haemoglobin (HbA1c)  $\geq 7\%$  or fasting blood glucose (FBG)  $>7.0$  mmol/L).

Results: In terms of HbA1c and FBG, the 5-year period prevalence of poor glycaemic control was 50.3% (n=698) and 57.3% (n=791), respectively. In terms of HbA1c and FBG, the odds of poor glycaemic control increased with the duration of T2DM ( $>1$  to 2 years: OR 1.84, 95% CI 1.06 to 3.19;  $>2$  to 4 years: 3.32, 1.88 to 5.85; and  $>4$  years: 5.98, 4.09 to 8.75; and  $>1$  to 2 years: 2.10, 1.22 to 3.62;  $>2$  to 4 years: 2.48, 1.42 to 4.34; and  $>4$  years: 3.34, 2.32 to 4.80) and were higher in patients residing in rural areas (1.68, 1.24 to 2.28; and 1.42, 1.06 to 1.91) and with hyperlipidaemia (1.57, 1.12 to 2.19; and 1.68, 1.21 to 2.33), respectively. In addition, in terms of HbA1c, the odds of poor glycaemic control were higher in patients on diet, physical activity, oral hypoglycaemic drug and insulin as part of their T2DM therapeutic regimen (1.37, 1.02 to 1.86). In terms of HbA1c and FBG, the odds of poor glycaemic control were lower in patients only on diet and physical activity as part of their T2DM therapeutic regimen (0.56, 0.31 to 0.99; and 0.42, 0.24 to 0.74), respectively.

Conclusions: More than half of T2DM patients at the Diabetes Centre in Ningbo, China have poor glycaemic control, and the predictors of glycaemic control were

1  
2  
3 identified. The study findings could be taken into consideration in future  
4 interventional studies aimed at improving glycaemic control in these patients.  
5  
6

### 7 **Keywords**

8  
9  
10 Type 2 diabetes; poor glycaemic control; China  
11

### 12 **Strengths and limitations of this study**

- 13  
14  
15  
16  
17  
18  
19  
20  
21  
22  
23  
24  
25  
26  
27  
28  
29  
30  
31  
32  
33  
34  
35  
36  
37  
38  
39  
40  
41  
42  
43  
44  
45  
46  
47  
48  
49  
50  
51  
52  
53  
54  
55  
56  
57  
58  
59  
60
- This is the first study to explore glycaemic control in type 2 diabetes patients at the tertiary care Diabetes Centre in Ningbo, China and, as far as we are aware, in the Zhejiang province of China.
  - Glycated haemoglobin (which reflects the average blood glucose level over the past three months) and fasting blood glucose (a short-term index) were used to determine glycaemic control, which in turn provided a complete picture.
  - Missing data could lead to bias but were generally low in this study. Multiple regression analyses included a sample with missing values for the adjusted variables.
  - This retrospective study was conducted using an existing database, which is primarily developed for the clinical purpose and not for research (i.e., issues with routinely collected data were present).
  - As this was a cross-sectional study, it was not possible to determine the causal association between different variables and glycaemic control.

## Introduction

China has the world's largest type 2 diabetes (T2DM) epidemic, a complex metabolic disorder which has major health, social and economic consequences. Almost 11% of all adults are currently living with T2DM (around 114 million). This number is expected to increase to around 150 million by 2040 [1]. Its chronic hyperglycaemia is associated with long-term complications (e.g., cardiovascular disease) and even death [2]. In China, T2DM and its complications contribute to almost one million deaths each year. Alarmingly, nearly 40% of these deaths are premature (i.e., in people below the age of 70) [3]. China spends upwards of US \$25 billion a year on the management of T2DM and 13% of its medical expenditures are directly caused by T2DM [4]. In spite of this, many T2DM patients have poor glycaemic control (51-68%) [5-9]. Unfortunately, these figures are much higher as compared to many developed countries [10,11].

In China, hospitals are categorised into three: primary care, secondary care and tertiary care. A primary care hospital (community hospital with general practitioners) usually has less than 100 beds, and are mainly responsible for providing preventive care and minimal health services. A secondary care hospital usually has 100 to 500 beds, and are mainly responsible for providing health services and for performing a role in medical education and research. A tertiary care hospital usually has more than 500 beds, and are mainly responsible for providing specialist health services and for performing a bigger role in medical education and research [12]. In China, people (including T2DM patients) can attend any hospital of their choice. In other words, it is not based on any referral system by the community hospital with general practitioners.

Ningbo is one of the most economically developed Chinese cities, located in the northeast Zhejiang province. In 2015, the prevalence of T2DM in people over 40 years of age in the city was around 21% [13]. There are 152 community hospitals with general practitioners, 21 secondary hospitals and 21 tertiary care hospitals in the city. Ningbo First Hospital, with 1600 beds, is a tertiary care hospital. Local patients, as well as those from surrounding areas, visit this hospital [14]. The hospital's Diabetes Centre has a team of qualified and experienced diabetes experts. Till date, no research has been conducted to explore glycaemic control in T2DM

1  
2  
3 patients at the Diabetes Centre. The aim of the study was to assess their glycaemic  
4 control and to determine factors that independently predict their glycaemic control.  
5 Knowledge of factors associated with the poor glycaemic control in these patients  
6 would provide valuable information about strategies that healthcare professionals  
7 and providers can address to improve their glycaemic control.  
8  
9  
10

## 11 **Methods**

### 12 *Study design, data source and period*

13  
14  
15 A retrospective cross-sectional study was conducted using an existing computerised  
16 medical records database, the Diabetes Information Management System. This  
17 database was developed by the Yinal Software Corporation, China for the Diabetes  
18 Centre. The study period was from 1<sup>st</sup> July 2012 to 30 June 2017 (5 years) and the  
19 database included 6699 patients.  
20  
21  
22  
23  
24  
25

### 26 *Study population, inclusion and exclusion criteria*

27  
28  
29 The study included adult (18 years of age or older) patients, diagnosed with T2DM,  
30 and registered and received treatment at the Diabetes Centre for at least six  
31 consecutive months. In China, T2DM patients are usually given at least six months'  
32 time to adjust to their T2DM therapeutic regimen and control their blood glucose  
33 levels. Those diagnosed with type 1 diabetes, gestational diabetes, secondary  
34 diabetes, unknown type of diabetes or endocrine diseases (such as Cushing  
35 syndrome and hyperthyroidism which may increase their blood glucose levels) were  
36 excluded from the study. The study inclusion criteria were satisfied by 1387 patients.  
37  
38  
39  
40  
41  
42

### 43 *Study variables*

44  
45  
46 The following variables (measured after six months of treatment at the Diabetes  
47 Centre) were extracted from the database: age (18-39 years, 40-59 years, or ≥60  
48 years), sex (male or female), education (university/college, class 7 to 12, class 1 to  
49 6, or no qualifications), occupation (manual workers (i.e., more physical than mental  
50 work), non-manual workers (i.e., more mental than physical work) or never  
51 worked/retired), marital status (married or single/divorced/widowed), residence  
52 (urban or rural based on the "hukou" system (i.e., residence registration system in  
53  
54  
55  
56  
57  
58

China)) [15], health insurance, smoking (current status), alcohol drinking (current status), family history of T2DM (any parent or sibling), duration of T2DM ( $\leq 1$  year,  $> 1$  to 2 years,  $> 2$  to 4 years, or  $> 4$  years), number of visits to the Diabetes Centre for T2DM since registration, T2DM therapeutic regimen (only diet and physical activity; diet and physical activity and oral hypoglycaemic drug (OHD - metformin, acarbose, sulfonylureas, meglitinides and/or thiazolidinediones); diet and physical activity and insulin (long-term insulin, intermediate insulin, rapid-acting insulin and/or premix insulin); or diet and physical activity, OHD and insulin)[16], comorbidities (overweight or obese (diagnosis based on body mass index (BMI)  $\geq 24$  kg/m<sup>2</sup>) [17], hypertension (diagnosis based on blood pressure  $\geq 140/90$  mm Hg), and hyperlipidaemia (diagnosis based on serum lipids- total cholesterol  $\geq 4.5$  mmol/L or triglycerides  $\geq 1.7$  mmol/L)), and blood glucose levels. Following the current guideline for the prevention and management of T2DM in China, poor glycaemic control was defined as glycated haemoglobin (HbA1c)  $\geq 7\%$  or fasting blood glucose (FBG)  $> 7.0$  mmol/L [16]. The HbA1c was estimated using the high-performance liquid chromatographic (HPLC) method, using the D-10 Hemoglobin Analyzer (Bio-Rad, USA). The FBG was estimated using the glucose oxidase method. It should be noted that data on dipeptidyl peptidase-4 (DPP-4) inhibitors and glucagon-like peptide 1 (GLP-1) receptor agonists were not available in the database. These drugs are not covered by the existing health insurance system in China and thus, these drugs are not sold in this hospital [18].

### *Ethics*

The study was ethically approved by the Research Ethics Committee at the Ningbo First Hospital, China.

### *Statistical analyses*

The 5-year period prevalence of poor glycaemic control in T2DM patients at the Diabetes Centre was calculated. Simple logistic regression methods were used to investigate the association between glycaemic control and other variables. To identify any independent association, multiple logistic regression models were developed using backward stepwise regression analyses and all the other variables were included. Sensitivity analyses were carried out – only those variables with a



P value of  $\leq 0.20$  in simple logistic regressions were included in multiple logistic regression models. Multiple regression models included a sample with unknown values for these adjusted variables. Odds ratios (ORs) and their respective 95% confidence intervals (CIs) were calculated. The results were considered significant when P values were  $\leq 0.05$ . All data were analysed using IBM SPSS Statistics Version 20.0 for Windows.

## Results

57% of T2DM patients were male and the mean age was 54.1 years. In terms of HbA1c and FBG, the 5-year period prevalence of poor glycaemic control was 50.3% (n=698) and 57.3% (n=791), respectively. Table 1 reports the characteristics of T2DM patients with good and poor glycaemic control. In terms of HbA1c and FBG, glycaemic control was found to be associated with age ( $p < 0.001$ ), education ( $< 0.001$ ), residence (0.012 and 0.042, respectively), duration of T2DM ( $< 0.001$ ) and T2DM therapeutic regimen ( $< 0.001$ ). The additional associated factors were hypertension (0.005) in the case of HbA1c, and alcohol drinking (0.040) and hyperlipidaemia (0.025) in the case of FBG.

Table 2 shows the multiple backward stepwise logistic regression analyses to determine factors independently associated with the poor glycaemic control. In terms of HbA1c and FBG, the odds of poor glycaemic control increased with the duration of T2DM (>1 to 2 years: OR 1.84, 95% CI 1.06 to 3.19; >2 to 4 years: 3.32, 1.88 to 5.85; and >4 years: 5.98, 4.09 to 8.75; and >1 to 2 years: 2.10, 1.22 to 3.62; >2 to 4 years: 2.48, 1.42 to 4.34; and >4 years: 3.34, 2.32 to 4.80) and were higher in patients residing in rural areas (1.68, 1.24 to 2.28; and 1.42, 1.06 to 1.91) and with hyperlipidaemia (1.57, 1.12 to 2.19; and 1.68, 1.21 to 2.33), respectively. In addition, in terms of HbA1c, the odds of poor glycaemic control were higher in patients on diet, physical activity, OHD and insulin as part of their T2DM therapeutic regimen (1.37, 1.02 to 1.86). In terms of HbA1c and FBG, the odds of poor glycaemic control were lower in patients only on diet and physical activity as part of their T2DM therapeutic regimen (0.56, 0.31 to 0.99; and 0.42, 0.24 to 0.74), respectively, and in terms of FBG, the odds were lower in patients with hypertension (0.73, 0.54 to 0.99).

1  
2  
3 Table 3 reports the sensitivity analyses - multiple logistic regression models included  
4 only those variables with a P value of  $\leq 0.20$  in simple logistic regressions. Similar  
5 results were found in the sensitivity analyses except for the association between  
6 glycaemic control (in terms of FBG) and hypertension. In terms of HbA1c and FBG,  
7 the odds of poor glycaemic control increased with the duration of T2DM (>1 to 2  
8 years: 1.83, 1.05 to 3.18; >2 to 4 years: 3.29, 1.88 to 5.77; and >4 years: 5.99, 4.09  
9 to 8.76; and >1 to 2 years: 1.67, 1.08 to 2.60; >2 to 4 years: 2.16, 1.40 to 3.33; and  
10 >4 years: 2.51, 1.89 to 3.32) and were higher in patients residing in rural areas (1.68,  
11 1.24 to 2.29; and 1.28, 1.01 to 1.62) and with hyperlipidaemia (1.58, 1.13 to 2.20;  
12 and 1.39, 1.05 to 1.83), respectively. In addition, in terms of HbA1c, the odds of poor  
13 glycaemic control were higher in patients on diet, physical activity, OHD and insulin  
14 as part of their T2DM therapeutic regimen (1.37, 1.02 to 1.85). In terms of HbA1c  
15 and FBG, the odds of poor glycaemic control were lower in patients only on diet and  
16 physical activity as part of their T2DM therapeutic regimen (0.52, 0.29 to 0.92; and  
17 0.53, 0.35 to 0.80), respectively.  
18  
19  
20  
21  
22  
23  
24  
25  
26  
27

## 28 Discussion

29  
30  
31 In terms of HbA1c and FBG, the 5-year period prevalence of poor glycaemic control  
32 in T2DM patients at the tertiary care Diabetes Centre in Ningbo, China was 50.3%  
33 and 57.3%, respectively. In other words, less than half of T2DM patients at the  
34 Diabetes Centre have adequate glycaemic control. The finding is consistent with a  
35 recent nationwide population-based study (51%) and a recent nationwide hospital-  
36 based study (52%) [5,6]. However, two other recent nationwide hospital-based  
37 studies reported much higher figures (65% and 68%) [7,8]. These hospital-based  
38 studies included a range of hospitals with different tier levels. In terms of glycaemic  
39 control in T2DM patients, tertiary care hospitals usually perform better as compared  
40 to primary or secondary care hospitals [19], and this could be the case in our study.  
41 Another reason could be different population characteristics in these studies. For  
42 example, the study which reported 68% included only those T2DM patients who  
43 were on OHDs alone or in combination with either insulin or GLP-1 receptor agonists,  
44 indicating poor glycaemic control with the disease progression. In spite of the  
45 availability of diabetes experts at this tertiary care Diabetes Centre and of effective  
46 and safe glucose-lowering therapies, the prevalence of poor glycaemic control in  
47  
48  
49  
50  
51  
52  
53  
54  
55  
56  
57  
58  
59  
60

1  
2  
3 T2DM patients was high in our study as compared to other studies conducted in  
4 various developed countries [10,11]. This indicates that there is still a room for  
5 improvement at this Diabetes Centre. It should be noted that Chinese people are  
6 more susceptible to T2DM as compared to Whites (e.g., they develop T2DM at a  
7 much younger age) [20]. It should also be noted that blood glucose levels of some  
8 patients could be relaxed, especially those who are old and frail. However, for the  
9 purpose of analysis, the glycaemic control was categorised into poor and good,  
10 based on the current guideline for the prevention and management of T2DM in  
11 China [16].  
12  
13  
14  
15  
16  
17

18 In the unadjusted models (HbA1c and FBG), glycaemic control was found to be  
19 associated with age, education, residence, duration of T2DM and T2DM therapeutic  
20 regimen. The additional associated factors were hypertension in the case of HbA1c,  
21 and alcohol drinking and hyperlipidaemia in the case of FBG. Previous studies  
22 conducted among T2DM patients in various countries reported similar and other  
23 factors associated with glycaemic control (such as age, sex, education, alcohol  
24 drinking, duration of T2DM, T2DM therapeutic regimen, overweight or obese,  
25 hypertension and hyperlipidaemia) [7,19,21-26].  
26  
27  
28  
29  
30  
31

32 In terms of HbA1c and FBG, the odds of poor glycaemic control increased with the  
33 duration of T2DM and were higher in patients residing in rural areas and with  
34 hyperlipidaemia. In addition, in terms of HbA1c, the odds of poor glycaemic control  
35 were higher in patients on diet, physical activity, OHD and insulin as part of their  
36 T2DM therapeutic regimen. In terms of HbA1c and FBG, the odds of poor glycaemic  
37 control were lower in patients only on diet and physical activity as part of their T2DM  
38 therapeutic regimen, and in terms of FBG, the odds were lower in patients with  
39 hypertension. Similar results were found in the sensitivity analyses except for the  
40 association between glycaemic control (in terms of FBG) and hypertension. The  
41 association found between poor glycaemic control and longer duration of T2DM is  
42 consistent with previous studies [8,21,26-28]. Since T2DM is a progressive disease,  
43 the function and mass of  $\beta$ -cells gradually decline with the disease progression [29].  
44 In order to attain glycaemic control, a stepwise approach has been recommended in  
45 the national T2DM management guideline [16]. The first and foremost step should be  
46 lifestyle modification (i.e., diet and physical activity), followed by addition of OHD(s)  
47  
48  
49  
50  
51  
52  
53  
54  
55  
56  
57  
58  
59  
60

1  
2  
3 and/or insulin(s) with the disease progression. An association was found between  
4 poor glycaemic control and addition of OHD(s) and insulin(s), and the finding is  
5 consistent with previous studies [26,30]. This relationship more likely represents a  
6 marker of T2DM chronicity and severity than of medication effects themselves.  
7 Another reason could be the failure of clinicians to intensify therapy in a timely  
8 manner [31,32]. The uptake and adherence to the T2DM therapeutic regimen among  
9 patients could also be different from what was prescribed [25,32]. A recent study  
10 showed that only 43% of T2DM patients adhered to their therapeutic regimen  
11 (OHD(s) and/or insulin(s)) in China [33]. In the database, data were available on  
12 prescription but not on uptake and adherence. Thus, these issues should be  
13 explored and be taken into consideration in future studies.  
14  
15  
16  
17  
18  
19  
20  
21

22 The “hukou” system was used to classify T2DM patients into urban or rural residents.  
23 An association was found between poor glycaemic control and rural residents, which  
24 indicates health inequalities in T2DM management. This finding is consistent with  
25 another recently conducted study in China [5]. In addition to poor socioeconomic  
26 conditions of rural residents in China, no or delayed access to healthcare is a major  
27 issue in rural areas [34]. Even the health insurance system is different in rural and  
28 urban areas [35-37]. There are discrepancies in resource allocation between rural  
29 and urban areas. All these could explain the association found between poor  
30 glycaemic control and rural residents.  
31  
32  
33  
34  
35  
36

37 Like T2DM, hyperlipidaemia is a risk factor for cardiovascular disease [38]. The  
38 association found between poor glycaemic control and hyperlipidaemia is consistent  
39 with previous studies [26,39]. Glycaemic control mainly depends on the degree of  
40 residual pancreatic  $\beta$ -cells function and insulin sensitivity [40,41]. It should be noted  
41 that in Chinese T2DM patients, the defects in  $\beta$ -cells function are more pronounced  
42 than decreased insulin sensitivity [42,43]. Abnormalities in lipid metabolism,  
43 characterised by an increase in serum lipids (total cholesterol and triglycerides), may  
44 result in lipid spill over to non-adipose tissues, such as pancreatic  $\beta$ -cells. This may  
45 lead to cellular dysfunction and lipoapoptosis [44,45]. It is also accepted that high  
46 serum triglyceride level is associated with insulin resistance [46]. These mechanisms  
47 may partly explain the association found between poor glycaemic control and  
48 hyperlipidaemia. Further research needs to be conducted to confirm the role of  
49  
50  
51  
52  
53  
54  
55  
56  
57  
58

1  
2  
3 hyperlipidaemia in long-term glycaemic control. In continuation, early initiation of  
4 lipid-lowering therapy in T2DM patients may reduce the risk for cardiovascular disease  
5 and may have benefits in terms of their long-term glycaemic control.  
6  
7

8  
9 The study has a number of strengths and weaknesses. This is the first study to  
10 explore glycaemic control in T2DM patients at the tertiary care Diabetes Centre in  
11 Ningbo, China. In addition, as far as we are aware, this is the first study on this issue  
12 in the Zhejiang province of China. HbA1c and FBG were used to determine  
13 glycaemic control, which in turn provided a complete picture. HbA1c reflects the  
14 average blood glucose level over the past three months. On the other hand, FBG is  
15 a short-term index. In terms of generalisability, the study findings could be valid in  
16 settings with similar populations and healthcare systems. Missing data could lead to  
17 bias but were generally low in this study. Multiple regression analyses included a  
18 sample with missing values for the adjusted variables. This retrospective study was  
19 conducted using an existing database, which is primarily developed for the clinical  
20 purpose and not for research. It is possible that our findings were the result of other  
21 factors not present in the database and thus, not adjusted for in the models, such as  
22 self-monitoring of blood glucose, uptake and adherence to the T2DM therapeutic  
23 regimen, and depression, anxiety and stress levels of patients [25,47,48]. Although  
24 the data were available on time, however, the other data quality issues of routinely  
25 collected data cannot be ignored, such as accuracy and reliability. Some of the data  
26 were self-reported (e.g., duration of T2DM), and recall error could have been a  
27 problem. This inaccurate measurement of the variable could mean that individuals  
28 were assigned to the wrong category, and then resulted in an incorrect estimation of  
29 the association between duration of T2DM and poor glycaemic control. As this was a  
30 cross-sectional study, it was not possible to determine the causal association  
31 between different variables and glycaemic control. A long-term, longitudinal study  
32 should be conducted among these patients to assess the impact of various factors  
33 (these as well as other potential factors) on their glycaemic control. Ours was a  
34 hospital-based study and a population-based study should be conducted, which  
35 might give a different picture. This could be because of different population  
36 characteristics, including their healthcare-seeking behavior.  
37  
38  
39  
40  
41  
42  
43  
44  
45  
46  
47  
48  
49  
50  
51  
52  
53  
54  
55  
56  
57  
58  
59  
60

1  
2  
3 In conclusion, more than half of T2DM patients at the Diabetes Centre in Ningbo,  
4 China have poor glycaemic control, and the predictors of glycaemic control were  
5 identified. The study findings could be taken into consideration in future  
6 interventional studies aimed at improving glycaemic control in these patients.  
7  
8

### 9 10 **Authors' contributions**

11  
12  
13 JL and KC designed the study, analysed the data and wrote the first draft of the  
14 manuscript. JL, KC, MX, YC, FH, JC and LL revised it critically for important  
15 intellectual content and approved the final version.  
16  
17

### 18 19 **Competing interests**

20  
21  
22 The authors declare that they have no competing interests.  
23

### 24 25 **Ethics approval and consent to participate**

26  
27 The study used an existing computerised medical records database, the Diabetes  
28 Information Management System. The study was ethically approved by the  
29 Research Ethics Committee at the Ningbo First Hospital, China.  
30  
31

### 32 33 **Data sharing**

34  
35  
36 The dataset will be available upon request unless there are legal or ethical reasons  
37 for not doing so.  
38  
39

### 40 41 **Funding**

42  
43 The study was supported by the Natural Science Foundation of Ningbo Municipality  
44 (CN) (Grant No. 2016A610169).  
45  
46

### 47 48 **Acknowledgements**

49  
50 The authors thank Yida Li (Yinal Software Corporation) for the management and  
51 organisation of original data and the patients.  
52  
53

### 54 55 **References**



1. International Diabetes Federation. IDF diabetes atlas. 8th edition. Brussels, Belgium. 2017.
2. World Health Organization. Global report on diabetes. Geneva, Switzerland. 2016.
3. World Health Organization. Rate of diabetes in China “explosive”. <http://www.wpro.who.int/china/mediacentre/releases/2016/20160406/en/> Accessed 23 August 2017.
4. Cheng TO. Diabetes epidemic in China and its economic impact. *Int J Cardiol.* 2011; 149:1-3.
5. Wang L, Gao P, Zhang M, Huang Z, Zhang D, Deng Q, Li Y, Zhao Z, Qin X, Jin D, Zhou M, Tang X, Hu Y, Wang L. Prevalence and ethnic pattern of diabetes and prediabetes in China in 2013. *JAMA.* 2017; 317:2515-23.
6. Ji L, Hu D, Pan C, Weng J, Huo Y, Ma C, Mu Y, Hao C, Ji Q, Ran X, Su B, Zhuo H, Fox KA, Weber M, Zhang D, CCMR Advisory Board, CCMR-3B Study Investigators. Primacy of the 3B approach to control risk factors for cardiovascular disease in type 2 diabetes patients. *Am J Med.* 2013; 126:925.e11-22.
7. Liu L, Lou Q, Guo X, Yuan L, Shen L, Sun Z, Zhao F, Dai X, Huang J, Yang H, Mordes JP, Chinese Diabetes Education Status Survey Study Group. Management status and its predictive factors in patients with type 2 diabetes in China: a nationwide multicenter study. *Diabetes Metab Res Rev.* 2015; 31:811-6.
8. Ji LN, Lu JM, Guo XH, Yang WY, Weng JP, Jia WP, Zou DJ, Zhou ZG, Yu DM, Liu J, Shan ZY, Yang YZ, Hu RM, Zhu DL, Yang LY, Chen L, Zhao ZG, Li QF, Tian HM, Ji QH, Liu J, Ge JP, Shi LX, Xu YC. Glycemic control among patients in China with type 2 diabetes mellitus receiving oral drugs or injectables. *BMC Public Health.* 2013; 13:602.
9. Xu Y, Wang L, He J, Bi Y, Li M, Wang T, Wang L, Jiang Y, Dai M, Lu J, Xu M, Li Y, Hu N, Li J, Mi S, Chen CS, Li G, Mu Y, Zhao J, Kong L, Chen J, Lai S, Wang W, Zhao W, Ning G, 2010 China Noncommunicable Disease Surveillance Group. Prevalence and control of diabetes in Chinese adults. *JAMA.* 2013; 310:948-59.
10. Lipska KJ, Yao X, Herrin J, McCoy RG, Ross JS, Steinman MA, Inzucchi SE, Gill TM, Krumholz HM, Shah ND. Trends in drug utilization, glycemic control, and rates of severe hypoglycemia, 2006-2013. *Diabetes Care.* 2017; 40:468-75.
11. Cheung BM, Ong KL, Cherny SS, Sham PC, Tso AW, Lam KS. Diabetes prevalence and therapeutic target achievement in the United States, 1999 to 2006. *Am J Med.* 2009; 122: 443-53.

12. Ministry of Health of the People's Republic of China. The measures for the administration of the hospital grade. 1989.
13. Yao DZ, Sun XH, Li JH, Guo WY. Prevalence and risk factors of diabetes in people over 40 years of age in Ningbo city area. *Modern Practical Medicine*. 2016; 28:1343-5.
14. The Public Health Service Platform of Ningbo. Ningbo First Hospital. <http://gzjk.nbws.gov.cn/f/mech?mechId=121> Accessed on 14 August 2017.
15. The National People's Congress of the People's Republic of China. Regulations of the People's Republic of China on Residence Registration. [http://www.npc.gov.cn/wxzl/gongbao/2000-12/10/content\\_5004332.htm](http://www.npc.gov.cn/wxzl/gongbao/2000-12/10/content_5004332.htm) Accessed on 23 August 2017.
16. Chinese Diabetes Society. China guideline for type 2 diabetes (2013 ed). *Chin J Endocrinol Metab*. 2014; 30:893-942.
17. Chinese Society of Endocrinology. Expert consensus on management of type 2 diabetes mellitus with obesity in Chinese. *Chin J Endocrinol Metab*. 2016; 32:623-7.
18. Ningbo Municipal Human Resources and Social Security Bureau. Catalogue of drugs for basic medical insurance. <http://www.zjnb.lss.gov.cn/cx/cxzx/ybxx/ybyp/ypmu/#Menu=1312> Accessed on 23 August 2017.
19. Bi Y, Zhu D, Cheng J, Zhu Y, Xu N, Cui S, Li W, Cheng X, Wang F, Hu Y, Shen S, Weng J. The status of glycemic control: a cross-sectional study of outpatients with type 2 diabetes mellitus across primary, secondary, and tertiary hospitals in the Jiangsu province of China. *Clin Ther*. 2010; 32:973-83.
20. Chiu M, Austin PC, Manuel DG, Shah BR, Tu JV. Deriving ethnic-specific BMI cutoff points for assessing diabetes risk. *Diabetes Care*. 2011; 34:1741-8.
21. Chan JC, Gagliardino JJ, Baik SH, Chantelot JM, Ferreira SR, Hancu N, Ilkova H, Ramachandran A, Aschner P, IDMPS Investigators. Multifaceted determinants for achieving glycemic control: the international diabetes management practice study (IDMPS). *Diabetes Care*. 2009; 32:227-33.
22. Shan S, Gu L, Lou Q, Ouyang X, Yu Y, Wu H, Bian R. Evaluation of glycemic control in patients with type 2 diabetes mellitus in Chinese communities: a cross-sectional study. *Clin Exp Med*. 2017; 17:79-84.



- 1  
2  
3 23. Shani M, Taylor TR, Vinker S, Lustman A, Erez R, Elhayany A, Lahad A.  
4 Characteristics of diabetics with poor glycemic control who achieve good control. *J*  
5 *Am Board Fam Med.* 2008; 21:490-6.  
6  
7 24. Roy S, Sherman A, Monari-Sparks MJ, Schweiker O, Jain N, Sims E, Breda M,  
8 Byraiah GP, Belecanech RG, Coletta MD, Barrios CJ, Hunter K, Gaughan JP.  
9 Association of comorbid and metabolic factors with optimal control of type 2 diabetes  
10 mellitus. *N Am J Med Sci.* 2016; 8:31-9.  
11  
12 25. Kamuhabwa AR, Charles E. Predictors of poor glycemic control in type 2 diabetic  
13 patients attending public hospitals in Dar es Salaam. *Drug Healthc Patient Saf.* 2014;  
14 6:155-65.  
15  
16 26. Sazlina SG, Mastura I, Cheong AT, Bujang Mohamad A, Jamaiyah H, Lee PY,  
17 Syed Alwi SA, Chew BH. Predictors of poor glycaemic control in older patients with  
18 type 2 diabetes mellitus. *Singapore Med J.* 2015; 56:284-90.  
19  
20 27. Li MZ, Ji LN, Meng ZL, Guo XH, Yang JK, Lu JM, Lü XF, Hong X. Management  
21 status of type 2 diabetes mellitus in tertiary hospitals in Beijing: gap between  
22 guideline and reality. *Chin Med J (Engl).* 2012; 125:4185-9.  
23  
24 28. Khattab M, Khader YS, Al-Khawaldeh A, Ajlouni K. Factors associated with poor  
25 glycemic control among patients with type 2 diabetes. *J Diabetes Complications.*  
26 2010; 24:84-9.  
27  
28 29. UK Prospective Diabetes Study Group. UK prospective diabetes study 16.  
29 Overview of 6 years' therapy of type II diabetes: a progressive disease. *Diabetes.*  
30 1995; 44:1249-58.  
31  
32 30. Chiu CJ, Wray LA. Factors predicting glycemic control in middle-aged and older  
33 adults with type 2 diabetes. *Prev Chronic Dis.* 2010; 7:A08.  
34  
35 31. Ji L, Zhang P, Weng J, Lu J, Guo X, Jia W, Yang W, Zou D, Zhou Z, Pan C, Gao  
36 Y, Li X, Zhu D, Li Y, Wu Y, Garg SK. Observational registry of basal insulin treatment  
37 (ORBIT) in patients with type 2 diabetes uncontrolled by oral hypoglycemic agents in  
38 China: study design and baseline characteristics. *Diabetes Technol Ther.* 2015;  
39 17:735-44.  
40  
41 32. Ross SA. Breaking down patient and physician barriers to optimize glycemic  
42 control in type 2 diabetes. *Am J Med.* 2013; 126:S38-48.  
43  
44 33. Le C, Rong S, Dingyun Y, Wenlong C. Socioeconomic disparities in type 2  
45 diabetes mellitus prevalence and self-management behaviors in rural southwest  
46 China. *Diabetes Res Clin Pract.* 2016; 121:9-16.  
47  
48  
49  
50  
51  
52  
53  
54  
55  
56  
57  
58

- 1  
2  
3 34. Syed ST, Gerber BS, Sharp LK. Traveling towards disease: transportation  
4 barriers to health care access. *J Community Health*. 2013; 38:976-93.  
5  
6 35. Yip WC, Hsiao WC, Chen W, Hu S, Ma J, Maynard A. Early appraisal of China's  
7 huge and complex health-care reforms. *Lancet*. 2012; 379:833-42.  
8  
9 36. Dong KY. Medical insurance system evolution in China. *China Economic*  
10 *Review*. 2009; 20:591-7.  
11  
12 37. Liu X, Wong H, Liu K. Outcome-based health equity across different social health  
13 insurance schemes for the elderly in China. *BMC Health Serv Res*. 2016; 16:9.  
14  
15 38. Nelson RH. Hyperlipidemia as a risk factor for cardiovascular disease. *Prim*  
16 *Care*. 2013; 40:195-211.  
17  
18 39. Zhang SL, Chen ZC, Yan L, Chen LH, Cheng H, Ji LN. Determinants for  
19 inadequate glycaemic control in Chinese patients with mild-to-moderate type 2  
20 diabetes on oral antidiabetic drugs alone. *Chin Med J (Engl)*. 2011; 124:2461-8.  
21  
22 40. Dansuntornwong B, Chanprasertyothin S, Jongjaroenprasert W, Ngarmukos C,  
23 Bunnag P, Puavilai G, Ongphiphadhanakul B. The relation between parameters from  
24 homeostasis model assessment and glycemic control in type 2 diabetes. *J Med*  
25 *Assoc Thai*. 2007; 90:2284-90.  
26  
27 41. TODAY Study Group. Effects of metformin, metformin plus rosiglitazone, and  
28 metformin plus lifestyle on insulin sensitivity and  $\beta$ -cell function in TODAY. *Diabetes*  
29 *Care*. 2013; 36:1749-57.  
30  
31 42. China Insulin Secretion Study Group. Features of insulin secretion and insulin  
32 resistance in Chinese newly-diagnosed type 2 diabetes. *Chin J Endocrinol Metab*.  
33 2008; 24:256-60.  
34  
35 43. Xiao J, Weng J, Ji L, Jia W, Lu J, Shan Z, Liu J, Tian H, Ji Q, Yang Z, Yang W;  
36 China National Diabetes and Metabolic Disorders Study Group. Worse pancreatic  $\beta$ -  
37 cell function and better insulin sensitivity in older Chinese without diabetes. *J*  
38 *Gerontol A Biol Sci Med Sci*. 2014; 69:463-70.  
39  
40 44. Kusminski CM, Shetty S, Orzi L, Unger RH, Scherer PE. Diabetes and apoptosis:  
41 lipotoxicity. *Apoptosis*. 2009; 14:1484-95.  
42  
43 45. Irace C, Tripolino C, Carallo C, Scavelli FB, Valle ED, Cortese C, Gnasso A.  
44 Clinical predictors of progressive beta-cell failure in type 2 diabetes. *J Investig Med*.  
45 2015; 63:802-5.  
46  
47  
48  
49  
50  
51  
52  
53  
54  
55  
56  
57  
58  
59  
60

- 1  
2  
3 46. Li N, Fu J, Koonen DP, Kuivenhoven JA, Snieder H, Hofker MH. Are  
4 hypertriglyceridemia and low HDL causal factors in the development of insulin  
5 resistance? *Atherosclerosis*. 2014; 233:130-8.  
6  
7 47. Gorska-Ciebiada M, Ciebiada M. Predictors of poor glycaemic control in type 2  
8 diabetic elderly patients with depressive syndrome. *Psychogeriatrics*. 2017; 7.  
9  
10 48. Anderson RJ, Grigsby AB, Freedland KE, de Groot M, McGill JB, Clouse RE,  
11 Lustman PJ. Anxiety and poor glycemic control: a meta-analytic review of the  
12 literature. *Int J Psychiatry Med*. 2002; 32:235-47.  
13  
14  
15  
16  
17  
18  
19  
20  
21  
22  
23  
24  
25  
26  
27  
28  
29  
30  
31  
32  
33  
34  
35  
36  
37  
38  
39  
40  
41  
42  
43  
44  
45  
46  
47  
48  
49  
50  
51  
52  
53  
54  
55  
56  
57  
58  
59  
60

Table 1 Characteristics of T2DM patients with good and poor glycaemic control

|                       |                         | <b>Good glycaemic control<br/>HbA1c&lt;7%<br/>(n=689)</b> | <b>Poor glycaemic control<br/>HbA1c≥7%<br/>(n=698)</b> | <b>P value</b> | <b>Good glycaemic control<br/>FBG≤7.0<br/>mmol/L<br/>(n=596)</b> | <b>Poor glycaemic control<br/>FBG&gt;7.0<br/>mmol/L<br/>(n=791)</b> | <b>P value</b> |
|-----------------------|-------------------------|-----------------------------------------------------------|--------------------------------------------------------|----------------|------------------------------------------------------------------|---------------------------------------------------------------------|----------------|
| <b>Age</b>            |                         |                                                           |                                                        |                |                                                                  |                                                                     |                |
|                       | 18-39 years             | 158 (22.9)                                                | 81 (11.6)                                              | <0.001         | 135 (22.7)                                                       | 104 (13.1)                                                          | <0.001         |
|                       | 40-59 years             | 323 (46.9)                                                | 300 (43.0)                                             |                | 247 (41.4)                                                       | 376 (47.5)                                                          |                |
|                       | ≥60 years               | 208 (30.2)                                                | 317 (45.4)                                             |                | 214 (35.9)                                                       | 311 (39.3)                                                          |                |
| <b>Sex</b>            |                         |                                                           |                                                        | 0.157          |                                                                  |                                                                     | 0.830          |
|                       | Male                    | 405 (58.8)                                                | 384 (55.0)                                             |                | 341 (57.2)                                                       | 448 (56.6)                                                          |                |
|                       | Female                  | 284 (41.2)                                                | 314 (45.0)                                             |                | 255 (42.8)                                                       | 343 (43.4)                                                          |                |
| <b>Education</b>      |                         |                                                           |                                                        | <0.001         |                                                                  |                                                                     | <0.001         |
|                       | University/college      | 166 (24.1)                                                | 102 (14.6)                                             |                | 145 (24.3)                                                       | 123 (15.5)                                                          |                |
|                       | Class 7-12              | 333 (48.3)                                                | 310 (44.4)                                             |                | 268 (45.0)                                                       | 375 (47.4)                                                          |                |
|                       | Class 1-6               | 122 (17.7)                                                | 204 (29.2)                                             |                | 117 (19.6)                                                       | 209 (26.4)                                                          |                |
|                       | No qualifications       | 35 (5.1)                                                  | 67 (9.6)                                               |                | 45 (7.6)                                                         | 57 (7.2)                                                            |                |
|                       | Unknown                 | 33 (4.8)                                                  | 15 (2.1)                                               |                | 21 (3.5)                                                         | 27 (3.4)                                                            |                |
| <b>Occupation</b>     |                         |                                                           |                                                        | 0.064          |                                                                  |                                                                     | 0.231          |
|                       | Manual workers          | 94 (13.6)                                                 | 121 (17.3)                                             |                | 87 (14.6)                                                        | 128 (16.2)                                                          |                |
|                       | Non-manual workers      | 138 (20.0)                                                | 141 (20.2)                                             |                | 127 (21.3)                                                       | 152 (19.2)                                                          |                |
|                       | Never worked/Retired    | 219 (31.8)                                                | 317 (45.4)                                             |                | 211 (35.4)                                                       | 325 (41.1)                                                          |                |
|                       | Unknown                 | 238 (34.5)                                                | 119 (17.0)                                             |                | 171 (28.7)                                                       | 186 (23.5)                                                          |                |
| <b>Marital status</b> |                         |                                                           |                                                        | 0.200          |                                                                  |                                                                     | 0.312          |
|                       | Married                 | 510 (74.0)                                                | 562 (80.5)                                             |                | 446 (74.8)                                                       | 626 (79.1)                                                          |                |
|                       | Single/divorced/widowed | 55 (8.0)                                                  | 77 (11.0)                                              |                | 61 (10.2)                                                        | 71 (9.0)                                                            |                |
|                       | Unknown                 | 124 (18.0)                                                | 59 (8.5)                                               |                | 89 (14.9)                                                        | 94 (11.9)                                                           |                |
| <b>Residence</b>      |                         |                                                           |                                                        | 0.012          |                                                                  |                                                                     | 0.042          |
|                       | Urban                   | 449 (65.2)                                                | 412 (59.0)                                             |                | 388 (65.1)                                                       | 473 (59.8)                                                          |                |

|                                                                            |                                            |            |            |        |            |            |        |
|----------------------------------------------------------------------------|--------------------------------------------|------------|------------|--------|------------|------------|--------|
|                                                                            | Rural                                      | 231 (33.5) | 281 (40.3) |        | 202 (33.9) | 310 (39.2) |        |
|                                                                            | Unknown                                    | 9 (1.3)    | 5 (0.7)    |        | 6 (1.0)    | 8 (1.0)    |        |
| <b>Health insurance</b>                                                    |                                            |            |            | 0.583  |            |            | 0.704  |
|                                                                            | Yes                                        | 641 (93.0) | 644 (92.3) |        | 554 (93.0) | 731 (92.4) |        |
|                                                                            | No                                         | 48 (7.0)   | 54 (7.7)   |        | 42 (7.0)   | 60 (7.6)   |        |
| <b>Smoking</b>                                                             |                                            |            |            | 0.076  |            |            | 0.505  |
|                                                                            | No                                         | 567 (82.3) | 548 (78.5) |        | 484 (81.2) | 631 (79.8) |        |
|                                                                            | Yes                                        | 122 (17.7) | 150 (21.5) |        | 112 (18.8) | 160 (20.2) |        |
| <b>Alcohol drinking</b>                                                    |                                            |            |            | 0.182  |            |            | 0.040  |
|                                                                            | No                                         | 617 (89.6) | 609 (87.2) |        | 539 (90.4) | 687 (86.9) |        |
|                                                                            | Yes                                        | 72 (10.4)  | 89 (12.8)  |        | 57 (9.6)   | 104 (13.1) |        |
| <b>Family history of T2DM</b>                                              |                                            |            |            | 0.604  |            |            | 0.095  |
|                                                                            | No                                         | 429 (62.3) | 444 (63.6) |        | 390 (65.4) | 483 (61.1) |        |
|                                                                            | Yes                                        | 260 (37.7) | 254 (36.4) |        | 206 (34.6) | 308 (38.9) |        |
| <b>Duration of T2DM</b>                                                    |                                            |            |            |        |            |            |        |
|                                                                            | ≤1 year                                    | 207 (30.1) | 93 (13.3)  | <0.001 | 173 (29.0) | 127 (16.1) | <0.001 |
|                                                                            | >1 to 2 years                              | 77 (11.2)  | 44 (6.3)   |        | 55 (9.2)   | 66 (8.3)   |        |
|                                                                            | >2 to 4 years                              | 72 (10.4)  | 60 (8.6)   |        | 53 (8.9)   | 79 (10.0)  |        |
|                                                                            | >4 years                                   | 291 (42.2) | 487 (69.8) |        | 275 (46.2) | 503 (63.6) |        |
|                                                                            | Unknown                                    | 42 (6.1)   | 14 (2.0)   |        | 40 (6.7)   | 16 (2.0)   |        |
| <b>Number of visits to the Diabetes Centre for T2DM since registration</b> |                                            | 8 (4,13)*  | 8 (5,13)*  | 0.335  | 8 (4,13)*  | 8 (5,13)*  | 0.214  |
| <b>T2DM therapeutic regimen</b>                                            |                                            |            |            | <0.001 |            |            | <0.001 |
|                                                                            | Diet and physical activity + OHD           | 335 (48.6) | 296 (42.4) |        | 267 (44.8) | 364 (46.0) |        |
|                                                                            | Only diet and physical activity            | 99 (14.4)  | 45 (6.4)   |        | 92 (15.4)  | 52 (6.6)   |        |
|                                                                            | Diet and physical activity + insulin       | 38 (5.5)   | 27 (3.9)   |        | 31 (5.2)   | 34 (4.3)   |        |
|                                                                            | Diet and physical activity + OHD + insulin | 217 (31.5) | 330 (47.3) |        | 206 (34.6) | 341 (43.1) |        |

|                            |         |            |            |       |            |            |
|----------------------------|---------|------------|------------|-------|------------|------------|
| <b>Overweight or obese</b> |         |            |            | 0.357 |            | 0.705      |
|                            | No      | 311 (45.1) | 303 (43.4) |       | 260 (43.6) | 354 (44.8) |
|                            | Yes     | 345 (50.1) | 372 (53.3) |       | 311 (52.2) | 406 (51.3) |
|                            | Unknown | 33 (4.8)   | 23 (3.3)   |       | 25 (4.2)   | 31 (3.9)   |
| <b>Hypertension</b>        |         |            |            | 0.005 |            | 0.847      |
|                            | No      | 321 (46.6) | 273 (39.1) |       | 257 (43.1) | 337 (42.6) |
|                            | Yes     | 368 (53.4) | 425 (60.9) |       | 339 (56.9) | 454 (57.4) |
| <b>Hyperlipidaemia</b>     |         |            |            | 0.051 |            | 0.025      |
|                            | No      | 164 (23.8) | 136 (19.5) |       | 146 (24.5) | 154 (19.5) |
|                            | Yes     | 525 (76.2) | 562 (80.5) |       | 450 (75.5) | 637 (80.5) |

n(%), P value excludes unknown.

\*Median (interquartile range (IQR)).

Table 2 Logistic regression analyses to determine factors independently associated with poor glycaemic control

|                                 |                                  | OR (95% CI)         | P value |
|---------------------------------|----------------------------------|---------------------|---------|
| <b>HbA1c≥7%</b>                 |                                  |                     |         |
| <b>Residence</b>                |                                  |                     |         |
|                                 | Urban                            | 1                   | <0.001  |
|                                 | Rural                            | 1.68 (1.24 to 2.28) |         |
| <b>Duration of T2DM</b>         |                                  |                     |         |
|                                 | ≤1 year                          | 1                   | <0.001  |
|                                 | >1 to 2 years                    | 1.84 (1.06 to 3.19) |         |
|                                 | >2 to 4 years                    | 3.32 (1.88 to 5.85) |         |
|                                 | >4 years                         | 5.98 (4.09 to 8.75) |         |
| <b>Marital status</b>           |                                  |                     |         |
|                                 | Married                          | 1                   | 0.098   |
|                                 | Single/divorced/widowed          | 1.45 (0.93 to 2.25) |         |
| <b>T2DM therapeutic regimen</b> |                                  |                     |         |
|                                 | Diet and physical activity + OHD | 1                   | 0.001   |

1  
2  
3  
4  
5  
6  
7  
8  
9  
10  
11  
12  
13  
14  
15  
16  
17  
18  
19  
20  
21  
22  
23  
24  
25  
26  
27  
28  
29  
30  
31  
32  
33  
34  
35  
36  
37  
38  
39  
40  
41  
42  
43  
44  
45  
46  
47

|                                 |                                            |                     |        |
|---------------------------------|--------------------------------------------|---------------------|--------|
|                                 | Only diet and physical activity            | 0.56 (0.31 to 0.99) |        |
|                                 | Diet and physical activity + insulin       | 0.55 (0.28 to 1.10) |        |
|                                 | Diet and physical activity + OHD + insulin | 1.37 (1.02 to 1.86) |        |
| <b>Hyperlipidaemia</b>          |                                            |                     | 0.008  |
|                                 | No                                         | 1                   |        |
|                                 | Yes                                        | 1.57 (1.12 to 2.19) |        |
| <b>FBG&gt;7mmol/L</b>           |                                            |                     | 0.019  |
| <b>Residence</b>                |                                            |                     |        |
|                                 | Urban                                      | 1                   |        |
|                                 | Rural                                      | 1.42 (1.06 to 1.91) |        |
| <b>Duration of T2DM</b>         |                                            |                     | <0.001 |
|                                 | ≤1 year                                    | 1                   |        |
|                                 | >1 to 2 years                              | 2.10 (1.22 to 3.62) |        |
|                                 | >2 to 4 years                              | 2.48 (1.42 to 4.34) |        |
|                                 | >4 years                                   | 3.34 (2.32 to 4.80) |        |
| <b>T2DM therapeutic regimen</b> |                                            |                     | 0.005  |
|                                 | Diet and physical activity + OHD           | 1                   |        |
|                                 | Only diet and physical activity            | 0.42 (0.24 to 0.74) |        |
|                                 | Diet and physical activity + insulin       | 0.84 (0.43 to 1.64) |        |
|                                 | Diet and physical activity + OHD + insulin | 1.16 (0.86 to 1.56) |        |
| <b>Hyperlipidaemia</b>          |                                            |                     | 0.002  |
|                                 | No                                         | 1                   |        |
|                                 | Yes                                        | 1.68 (1.21 to 2.33) |        |
| <b>Hypertension</b>             |                                            |                     | 0.045  |
|                                 | No                                         | 1                   |        |
|                                 | Yes                                        | 0.73 (0.54 to 0.99) |        |

Table 3 Sensitivity analyses: multiple logistic regression models included those variables with  $P \leq 0.20$  in simple logistic regressions

|                                            | OR (95% CI)         | P value |
|--------------------------------------------|---------------------|---------|
| <b>HbA1c<math>\geq</math>7%</b>            |                     |         |
| <b>Residence</b>                           |                     | <0.001  |
| Urban                                      | 1                   |         |
| Rural                                      | 1.68 (1.24 to 2.29) |         |
| <b>Duration of T2DM</b>                    |                     | <0.001  |
| $\leq$ 1 year                              | 1                   |         |
| >1 to 2 years                              | 1.83 (1.05 to 3.18) |         |
| >2 to 4 years                              | 3.29 (1.88 to 5.77) |         |
| >4 years                                   | 5.99 (4.09 to 8.76) |         |
| <b>Marital status</b>                      |                     | 0.096   |
| Married                                    | 1                   |         |
| Single/divorced/widowed                    | 1.45 (0.94 to 2.25) |         |
| <b>T2DM therapeutic regimen</b>            |                     | <0.001  |
| Diet and physical activity + OHD           | 1                   |         |
| Only diet and physical activity            | 0.52 (0.29 to 0.92) |         |
| Diet and physical activity + insulin       | 0.54 (0.27 to 1.06) |         |
| Diet and physical activity + OHD + insulin | 1.37 (1.02 to 1.85) |         |
| <b>Hyperlipidaemia</b>                     |                     | 0.007   |
| No                                         | 1                   |         |
| Yes                                        | 1.58 (1.13 to 2.20) |         |
| <b>FBG&gt;7mmol/L</b>                      |                     | 0.044   |
| <b>Residence</b>                           |                     |         |
| Urban                                      | 1                   |         |
| Rural                                      | 1.28 (1.01 to 1.62) |         |
| <b>Duration of T2DM</b>                    |                     | <0.001  |
| $\leq$ 1 year                              | 1                   |         |
| >1 to 2 years                              | 1.67 (1.08 to 2.60) |         |
| >2 to 4 years                              | 2.16 (1.40 to 3.33) |         |
| >4 years                                   | 2.51 (1.89 to 3.32) |         |



1  
2  
3  
4  
5  
6  
7  
8  
9  
10  
11  
12  
13  
14  
15  
16  
17  
18  
19  
20  
21  
22  
23  
24  
25  
26  
27  
28  
29  
30  
31  
32  
33  
34  
35  
36  
37  
38  
39  
40  
41  
42  
43  
44  
45  
46  
47

|                                            |     |                     |       |
|--------------------------------------------|-----|---------------------|-------|
| <b>T2DM therapeutic regimen</b>            |     |                     | 0.002 |
| Diet and physical activity + OHD           |     | 1                   |       |
| Only diet and physical activity            |     | 0.53 (0.35 to 0.80) |       |
| Diet and physical activity + insulin       |     | 0.88 (0.50 to 1.52) |       |
| Diet and physical activity + OHD + insulin |     | 1.21 (0.94 to 1.55) |       |
| <b>Hyperlipidaemia</b>                     |     |                     | 0.020 |
|                                            | No  | 1                   |       |
|                                            | Yes | 1.39 (1.05 to 1.83) |       |

---

For peer review only

**STROBE 2007 (v4) Statement—Checklist of items that should be included in reports of *cross-sectional studies***

| Section/Topic                | Item # | Recommendation                                                                                                                                                                       | Reported on page # |
|------------------------------|--------|--------------------------------------------------------------------------------------------------------------------------------------------------------------------------------------|--------------------|
| Title and abstract           | 1      | (a) Indicate the study's design with a commonly used term in the title or the abstract                                                                                               | 1,2                |
|                              |        | (b) Provide in the abstract an informative and balanced summary of what was done and what was found                                                                                  | 2                  |
| <b>Introduction</b>          |        |                                                                                                                                                                                      |                    |
| Background/rationale         | 2      | Explain the scientific background and rationale for the investigation being reported                                                                                                 | 4                  |
| Objectives                   | 3      | State specific objectives, including any prespecified hypotheses                                                                                                                     | 4                  |
| <b>Methods</b>               |        |                                                                                                                                                                                      |                    |
| Study design                 | 4      | Present key elements of study design early in the paper                                                                                                                              | 4,5                |
| Setting                      | 5      | Describe the setting, locations, and relevant dates, including periods of recruitment, exposure, follow-up, and data collection                                                      | 4,5                |
| Participants                 | 6      | (a) Give the eligibility criteria, and the sources and methods of selection of participants                                                                                          | 4,5                |
| Variables                    | 7      | Clearly define all outcomes, exposures, predictors, potential confounders, and effect modifiers. Give diagnostic criteria, if applicable                                             | 5,6                |
| Data sources/<br>measurement | 8*     | For each variable of interest, give sources of data and details of methods of assessment (measurement). Describe comparability of assessment methods if there is more than one group | 5,6                |
| Bias                         | 9      | Describe any efforts to address potential sources of bias                                                                                                                            | 5,6                |
| Study size                   | 10     | Explain how the study size was arrived at                                                                                                                                            | 4,5                |
| Quantitative variables       | 11     | Explain how quantitative variables were handled in the analyses. If applicable, describe which groupings were chosen and why                                                         | 5,6                |
| Statistical methods          | 12     | (a) Describe all statistical methods, including those used to control for confounding                                                                                                | 6                  |
|                              |        | (b) Describe any methods used to examine subgroups and interactions                                                                                                                  | n/a                |
|                              |        | (c) Explain how missing data were addressed                                                                                                                                          | 6                  |
|                              |        | (d) If applicable, describe analytical methods taking account of sampling strategy                                                                                                   | n/a                |
|                              |        | (e) Describe any sensitivity analyses                                                                                                                                                | 6                  |
| <b>Results</b>               |        |                                                                                                                                                                                      |                    |

|                          |     |                                                                                                                                                                                                              |                  |
|--------------------------|-----|--------------------------------------------------------------------------------------------------------------------------------------------------------------------------------------------------------------|------------------|
| Participants             | 13* | (a) Report numbers of individuals at each stage of study—eg numbers potentially eligible, examined for eligibility, confirmed eligible, included in the study, completing follow-up, and analysed            | 5,6              |
|                          |     | (b) Give reasons for non-participation at each stage                                                                                                                                                         | n/a              |
|                          |     | (c) Consider use of a flow diagram                                                                                                                                                                           | n/a              |
| Descriptive data         | 14* | (a) Give characteristics of study participants (eg demographic, clinical, social) and information on exposures and potential confounders                                                                     | 6, table 1       |
|                          |     | (b) Indicate number of participants with missing data for each variable of interest                                                                                                                          | table 1          |
| Outcome data             | 15* | Report numbers of outcome events or summary measures                                                                                                                                                         | 6, table 1       |
| Main results             | 16  | (a) Give unadjusted estimates and, if applicable, confounder-adjusted estimates and their precision (eg, 95% confidence interval). Make clear which confounders were adjusted for and why they were included | 6,7, table 1,2   |
|                          |     | (b) Report category boundaries when continuous variables were categorized                                                                                                                                    | 6,7, table 1,2,3 |
|                          |     | (c) If relevant, consider translating estimates of relative risk into absolute risk for a meaningful time period                                                                                             | n/a              |
| Other analyses           | 17  | Report other analyses done—eg analyses of subgroups and interactions, and sensitivity analyses                                                                                                               | 7, table 3       |
| <b>Discussion</b>        |     |                                                                                                                                                                                                              |                  |
| Key results              | 18  | Summarise key results with reference to study objectives                                                                                                                                                     | 7,8,9            |
| Limitations              | 19  | Discuss limitations of the study, taking into account sources of potential bias or imprecision. Discuss both direction and magnitude of any potential bias                                                   | 10               |
| Interpretation           | 20  | Give a cautious overall interpretation of results considering objectives, limitations, multiplicity of analyses, results from similar studies, and other relevant evidence                                   | 7,8,9            |
| Generalisability         | 21  | Discuss the generalisability (external validity) of the study results                                                                                                                                        | 10               |
| <b>Other information</b> |     |                                                                                                                                                                                                              |                  |
| Funding                  | 22  | Give the source of funding and the role of the funders for the present study and, if applicable, for the original study on which the present article is based                                                | 11               |

\*Give information separately for cases and controls in case-control studies and, if applicable, for exposed and unexposed groups in cohort and cross-sectional studies.

**Note:** An Explanation and Elaboration article discusses each checklist item and gives methodological background and published examples of transparent reporting. The STROBE checklist is best used in conjunction with this article (freely available on the Web sites of PLoS Medicine at <http://www.plosmedicine.org/>, Annals of Internal Medicine at <http://www.annals.org/>, and Epidemiology at <http://www.epidem.com/>). Information on the STROBE Initiative is available at [www.strobe-statement.org](http://www.strobe-statement.org).

# BMJ Open

## Glycaemic control in type 2 diabetes patients and its predictors: a retrospective database study at a tertiary care Diabetes Centre in Ningbo, China

|                                 |                                                                                                                                                                                                                                                                                                                                                                                                                                                                          |
|---------------------------------|--------------------------------------------------------------------------------------------------------------------------------------------------------------------------------------------------------------------------------------------------------------------------------------------------------------------------------------------------------------------------------------------------------------------------------------------------------------------------|
| Journal:                        | <i>BMJ Open</i>                                                                                                                                                                                                                                                                                                                                                                                                                                                          |
| Manuscript ID                   | bmjopen-2017-019697.R2                                                                                                                                                                                                                                                                                                                                                                                                                                                   |
| Article Type:                   | Research                                                                                                                                                                                                                                                                                                                                                                                                                                                                 |
| Date Submitted by the Author:   | 02-Feb-2018                                                                                                                                                                                                                                                                                                                                                                                                                                                              |
| Complete List of Authors:       | Li, Jialin; Department of Endocrinology and Metabolism Chattopadhyay, Kaushik; University of Nottingham School of Health Sciences, ; London School of Hygiene and Tropical Medicine, Xu, Miao; Department of Endocrinology and Metabolism Chen, Yanshu; Department of Endocrinology and Metabolism Hu, Fangfang; Department of Endocrinology and Metabolism Chu, Jianping; Department of Endocrinology and Metabolism li, li; Department of Endocrinology and Metabolism |
| <b>Primary Subject Heading</b>: | Diabetes and endocrinology                                                                                                                                                                                                                                                                                                                                                                                                                                               |
| Secondary Subject Heading:      | Epidemiology                                                                                                                                                                                                                                                                                                                                                                                                                                                             |
| Keywords:                       | Type 2 diabetes, Poor glycaemic control, China                                                                                                                                                                                                                                                                                                                                                                                                                           |
|                                 |                                                                                                                                                                                                                                                                                                                                                                                                                                                                          |

SCHOLARONE™  
Manuscripts

Only

**Title**

Glycaemic control in type 2 diabetes patients and its predictors: a retrospective database study at a tertiary care Diabetes Centre in Ningbo, China

Jialin Li<sup>\*1</sup>, Kaushik Chattopadhyay<sup>\*2</sup>, Miao Xu<sup>1</sup>, Yanshu Chen<sup>1</sup>, Fangfang Hu<sup>1</sup>, Jianping Chu<sup>1</sup>, Li Li<sup>1</sup>

<sup>1</sup> Department of Endocrinology and Metabolism, Ningbo First Hospital, Ningbo, PR China

<sup>2</sup> Division of Epidemiology and Public Health, School of Medicine, The University of Nottingham, Nottingham, UK

\* Co-first authors

Corresponding author: Dr. Li Li, Ningbo First Hospital, Liuting Street 59, Ningbo City, Zhejiang Province, PR China; Tel: +8613757426626; E-mail address: lilyningbo@163.com

## Abstract

Objectives: The aim of the study was to assess glycaemic control in type 2 diabetes (T2DM) patients at a tertiary care Diabetes Centre in Ningbo, China, and to determine factors that independently predict their glycaemic control.

Design: Retrospective cross-sectional study using an existing database, the Diabetes Information Management System.

Setting: Tertiary care Diabetes Centre in Ningbo, China.

Participants: The study included adult T2DM patients, registered and receiving treatment at the Diabetes Centre for at least six consecutive months. The study inclusion criteria were satisfied by 1387 patients, from 1 July 2012 to 30 June 2017.

Primary outcome measure: Glycaemic control (poor was defined as glycated haemoglobin (HbA1c)  $\geq 7\%$  or fasting blood glucose (FBG)  $>7.0$  mmol/L).

Results: In terms of HbA1c and FBG, the 5-year period prevalence of poor glycaemic control was 50.3% and 57.3%, respectively. In terms of HbA1c and FBG, the odds of poor glycaemic control increased with the duration of T2DM ( $>1$  to 2 years: OR 1.84, 95% CI 1.06-3.19;  $>2$  to 4 years: 3.32, 1.88-5.85; and  $>4$  years: 5.98, 4.09-8.75; and  $>1$  to 2 years: 2.10, 1.22-3.62;  $>2$  to 4 years: 2.48, 1.42-4.34; and  $>4$  years: 3.34, 2.32-4.80) and were higher in patients residing in rural areas (1.68, 1.24-2.28; and 1.42, 1.06-1.91), with hyperlipidaemia (1.57, 1.12-2.19; and 1.68, 1.21-2.33), on diet, physical activity and oral hypoglycaemic drug (OHD) as part of their T2DM therapeutic regimen (1.80, 1.01-3.23; and 2.40, 1.36-4.26), and on diet, physical activity, OHD and insulin (2.47, 1.38-4.41; and 2.78, 1.58-4.92), respectively.

Conclusions: More than half of T2DM patients at the Diabetes Centre in Ningbo, China have poor glycaemic control, and the predictors of glycaemic control were identified. The study findings could be taken into consideration in future interventional studies aimed at improving glycaemic control in these patients.

## Keywords

Type 2 diabetes; poor glycaemic control; China

#### **Strengths and limitations of this study**

- This is the first study to explore glycaemic control in type 2 diabetes patients at the tertiary care Diabetes Centre in Ningbo, China and, as far as we are aware, in the Zhejiang province of China.
- Glycated haemoglobin (which reflects the average blood glucose level over the past three months) and fasting blood glucose (a short-term index) were used to determine glycaemic control, which in turn provided a complete picture.
- Missing data could lead to bias but were generally low in this study. Multiple regression analyses included a sample with missing values for the adjusted variables.
- This retrospective study was conducted using an existing database, which is primarily developed for the clinical purpose and not for research (i.e., issues with routinely collected data were present).
- As this was a cross-sectional study, it was not possible to determine the causal association between different variables and glycaemic control.

## Introduction

China has the world's largest type 2 diabetes (T2DM) epidemic, a complex metabolic disorder which has major health, social and economic consequences. Almost 11% of all adults are currently living with T2DM (around 114 million). This number is expected to increase to around 150 million by 2040 [1]. Its chronic hyperglycaemia is associated with long-term complications (e.g., cardiovascular disease) and even death [2]. In China, T2DM and its complications contribute to almost one million deaths each year. Alarmingly, nearly 40% of these deaths are premature (i.e., in people below the age of 70) [3]. China spends upwards of US \$25 billion a year on the management of T2DM and 13% of its medical expenditures are directly caused by T2DM [4]. In spite of this, many T2DM patients have poor glycaemic control (51-68%) [5-9]. Unfortunately, these figures are much higher as compared to many developed countries [10,11].

In China, hospitals are categorised into three: primary care, secondary care and tertiary care. A primary care hospital (community hospital with general practitioners) usually has less than 100 beds, and are mainly responsible for providing preventive care and minimal health services. A secondary care hospital usually has 100 to 500 beds, and are mainly responsible for providing health services and for performing a role in medical education and research. A tertiary care hospital usually has more than 500 beds, and are mainly responsible for providing specialist health services and for performing a bigger role in medical education and research [12]. In China, people (including T2DM patients) can attend any hospital of their choice. In other words, it is not based on any referral system by the community hospital with general practitioners.

Ningbo is one of the most economically developed Chinese cities, located in the northeast Zhejiang province. In 2015, the prevalence of T2DM in people over 40 years of age in the city was around 21% [13]. There are 152 community hospitals with general practitioners, 21 secondary hospitals and 21 tertiary care hospitals in the city. Ningbo First Hospital, with 1600 beds, is a tertiary care hospital. Local patients, as well as those from surrounding areas, visit this hospital [14]. The hospital's Diabetes Centre has a team of qualified and experienced diabetes experts. Till date, no research has been conducted to explore glycaemic control in T2DM



1  
2  
3 patients at the Diabetes Centre. The aim of the study was to assess their glycaemic  
4 control and to determine factors that independently predict their glycaemic control.  
5 Knowledge of factors associated with the poor glycaemic control in these patients  
6 would provide valuable information about strategies that healthcare professionals  
7 and providers can address to improve their glycaemic control.  
8  
9  
10

## 11 **Methods**

### 12 *Study design, data source and period*

13  
14  
15 A retrospective cross-sectional study was conducted using an existing computerised  
16 medical records database, the Diabetes Information Management System. This  
17 database was developed by the Yinal Software Corporation, China for the Diabetes  
18 Centre. The study period was from 1<sup>st</sup> July 2012 to 30 June 2017 (5 years) and the  
19 database included 6699 patients.  
20  
21  
22  
23  
24  
25

### 26 *Study population, inclusion and exclusion criteria*

27  
28  
29 The study included adult (18 years of age or older) patients, diagnosed with T2DM,  
30 and registered and receiving treatment at the Diabetes Centre for at least six  
31 consecutive months. In China, T2DM patients are usually given at least six months'  
32 time to adjust to their T2DM therapeutic regimen and control their blood glucose  
33 levels. Those diagnosed with type 1 diabetes, gestational diabetes, secondary  
34 diabetes, unknown type of diabetes or endocrine diseases (such as Cushing  
35 syndrome and hyperthyroidism which may increase their blood glucose levels) were  
36 excluded from the study. The study inclusion criteria were satisfied by 1387 patients.  
37  
38  
39  
40  
41  
42

### 43 *Study variables*

44  
45  
46 The following variables (measured after six months of treatment at the Diabetes  
47 Centre) were extracted from the database: age (18-39 years, 40-59 years, or  $\geq 60$   
48 years); sex; education (university/college, class 7 to 12, class 1 to 6, or no  
49 qualifications); occupation: manual workers (i.e., more physical than mental work),  
50 non-manual workers (i.e., more mental than physical work) or never worked/retired;  
51 marital status (married or single/divorced/widowed); residence: urban or rural based  
52 on the "hukou" system (i.e., residence registration system in China)) [15]; health  
53  
54  
55  
56  
57  
58

1  
2  
3 insurance; smoking (current status); alcohol drinking (current status); family history  
4 of T2DM (any parent or sibling); duration of T2DM ( $\leq 1$  year,  $>1$  to 2 years,  $>2$  to 4  
5 years, or  $>4$  years); number of visits to the Diabetes Centre for T2DM since  
6 registration; T2DM therapeutic regimen: only diet and physical activity, diet and  
7 physical activity and oral hypoglycaemic drug (OHD - metformin, acarbose,  
8 sulfonylureas, meglitinides and/or thiazolidinediones), diet and physical activity and  
9 insulin (long-term insulin, intermediate insulin, rapid-acting insulin and/or premix  
10 insulin), or diet and physical activity, OHD and insulin [16]; body mass index (BMI):  
11 under ( $<18.5$  kg/m<sup>2</sup>), normal (18.5-23.9 kg/m<sup>2</sup>), overweight (24.0-27.9 kg/m<sup>2</sup>) or  
12 obese ( $\geq 28$  kg/m<sup>2</sup>) [17]; hypertension (diagnosis based on blood pressure  $\geq 140/90$   
13 mm Hg); hyperlipidaemia (diagnosis based on serum lipids - total cholesterol  $\geq 4.5$   
14 mmol/L or triglycerides  $\geq 1.7$  mmol/L)); and blood glucose levels. Following the  
15 current guideline for the prevention and management of T2DM in China, poor  
16 glycaemic control was defined as glycated haemoglobin (HbA1c)  $\geq 7\%$  or fasting  
17 blood glucose (FBG)  $>7.0$  mmol/L [16]. The HbA1c was estimated using the high-  
18 performance liquid chromatographic (HPLC) method, using the D-10 Hemoglobin  
19 Analyzer (Bio-Rad, USA). The FBG was estimated using the glucose oxidase  
20 method. It should be noted that data on dipeptidyl peptidase-4 (DPP-4) inhibitors and  
21 glucagon-like peptide 1 (GLP-1) receptor agonists were not available in the  
22 database. These drugs are not covered by the existing health insurance system in  
23 China and thus, these drugs are not sold in this hospital [18].  
24  
25  
26  
27  
28  
29  
30  
31  
32  
33  
34  
35  
36  
37

### 38 *Ethics*

39  
40  
41 The study was ethically approved by the Research Ethics Committee at the Ningbo  
42 First Hospital, China.  
43  
44

### 45 *Statistical analyses*

46  
47  
48 The 5-year period prevalence of poor glycaemic control in T2DM patients at the  
49 Diabetes Centre was calculated. Simple logistic regression methods were used to  
50 investigate the association between glycaemic control and other variables. To  
51 identify any independent association, multiple logistic regression models were  
52 developed using backward stepwise regression analyses and all the other variables  
53 were included. Sensitivity analyses were carried out – only those variables with a  
54  
55  
56  
57  
58

1  
2  
3 P value of  $\leq 0.20$  in simple logistic regressions were included in multiple logistic  
4 regression models. Multiple regression models included a sample with unknown  
5 values for these adjusted variables. Odds ratios (ORs) and their respective 95%  
6 confidence intervals (CIs) were calculated. The results were considered significant  
7 when P values were  $\leq 0.05$ . All data were analysed using IBM SPSS Statistics  
8 Version 20.0 for Windows.  
9  
10  
11

## 12 13 **Results**

14  
15  
16 57% of T2DM patients were male and the mean age was 54.1 years. In terms of  
17 HbA1c and FBG, the 5-year period prevalence of poor glycaemic control was 50.3%  
18 (n=698) and 57.3% (n=791), respectively. Table 1 reports the characteristics of  
19 T2DM patients with good and poor glycaemic control. In terms of HbA1c and FBG,  
20 glycaemic control was found to be associated with age, education, residence,  
21 duration of T2DM and T2DM therapeutic regimen. The additional associated factors  
22 were hypertension in the case of HbA1c, and alcohol drinking and hyperlipidaemia in  
23 the case of FBG.  
24  
25  
26  
27  
28

29  
30 Table 2 shows the multiple backward stepwise logistic regression analyses to  
31 determine factors independently associated with the poor glycaemic control. In terms  
32 of both HbA1c and FBG, the odds of poor glycaemic control increased with the  
33 duration of T2DM and were higher in patients residing in rural areas, with  
34 hyperlipidaemia, on diet, physical activity and OHD as part of their T2DM therapeutic  
35 regimen, and on diet, physical activity, OHD and insulin. In addition, in terms of FBG,  
36 the odds of poor glycaemic control were lower in patients with hypertension.  
37  
38  
39  
40  
41  
42

43 Table 3 reports the sensitivity analyses - multiple logistic regression models included  
44 only those variables with a P value of  $\leq 0.20$  in simple logistic regressions. Similar  
45 results were found in the sensitivity analyses except for the association between  
46 glycaemic control (in terms of FBG) and hypertension.  
47  
48  
49

## 50 51 **Discussion**

52  
53 In terms of HbA1c and FBG, the 5-year period prevalence of poor glycaemic control  
54 in T2DM patients at the tertiary care Diabetes Centre in Ningbo, China was 50.3%  
55  
56  
57

1  
2  
3 and 57.3%, respectively. In other words, less than half of T2DM patients at the  
4 Diabetes Centre have adequate glycaemic control. The finding is consistent with a  
5 recent nationwide population-based study (51%) and a recent nationwide hospital-  
6 based study (52%) [5,6]. However, two other recent nationwide hospital-based  
7 studies reported much higher figures (65% and 68%) [7,8]. These hospital-based  
8 studies included a range of hospitals with different tier levels. In terms of glycaemic  
9 control in T2DM patients, tertiary care hospitals usually perform better as compared  
10 to primary or secondary care hospitals [19], and this could be the case in our study.  
11 Another reason could be different population characteristics in these studies. For  
12 example, the study which reported 68% included only those T2DM patients who  
13 were on OHDs alone or in combination with either insulin or GLP-1 receptor agonists,  
14 indicating poor glycaemic control with the disease progression. In spite of the  
15 availability of diabetes experts at this tertiary care Diabetes Centre, the prevalence of  
16 poor glycaemic control in T2DM patients was high in our study as compared to other  
17 studies conducted in various developed countries [10,11]. Some of the reasons  
18 could be non-usage of new hypoglycaemic drugs (such as DPP-IV inhibitors and  
19 GLP-1 receptor agonists) and inadequate self-management of T2DM in this  
20 population. This indicates that there is still a room for improvement at this Diabetes  
21 Centre. It should be noted that Chinese people are more susceptible to T2DM as  
22 compared to Whites (e.g., they develop T2DM at a much younger age) [20]. It should  
23 also be noted that blood glucose levels of some patients could be relaxed, especially  
24 those who are old and frail. However, for the purpose of analysis, the glycaemic  
25 control was categorised into poor and good, based on the current guideline for the  
26 prevention and management of T2DM in China [16].  
27  
28  
29  
30  
31  
32  
33  
34  
35  
36  
37  
38  
39  
40  
41  
42

43 In the unadjusted models (HbA1c and FBG), glycaemic control was found to be  
44 associated with age, education, residence, duration of T2DM and T2DM therapeutic  
45 regimen. The additional associated factors were hypertension in the case of HbA1c,  
46 and alcohol drinking and hyperlipidaemia in the case of FBG. Previous studies  
47 conducted among T2DM patients in various countries reported similar and other  
48 factors associated with glycaemic control (such as age, sex, education, alcohol  
49 drinking, duration of T2DM, T2DM therapeutic regimen, overweight or obese,  
50 hypertension and hyperlipidaemia) [7,19,21-26].  
51  
52  
53  
54  
55  
56  
57  
58

1  
2  
3  
4  
5  
6 The association found between poor glycaemic control and longer duration of T2DM  
7 is consistent with previous studies [8,21,26-28]. Since T2DM is a progressive  
8 disease, the function and mass of  $\beta$ -cells gradually decline with the disease  
9 progression [29]. In order to attain glycaemic control, a stepwise approach has been  
10 recommended in the national T2DM management guideline [16]. The first and  
11 foremost step should be lifestyle modification (i.e., diet and physical activity),  
12 followed by addition of OHD(s) and/or insulin(s) with the disease progression. An  
13 association was found between poor glycaemic control and addition of OHD(s) and  
14 insulin(s), and the finding is consistent with previous studies [26,30]. This relationship  
15 more likely represents a marker of T2DM chronicity and severity than of medication  
16 effects themselves. Another reason could be the failure of clinicians to intensify  
17 therapy in a timely manner [31,32]. The uptake and adherence to the T2DM  
18 therapeutic regimen among patients could also be different from what was  
19 prescribed [25,32]. A recent study showed that only 43% of T2DM patients adhered  
20 to their therapeutic regimen (OHD(s) and/or insulin(s)) in China [33]. In the database,  
21 data were available on prescription but not on uptake and adherence. Thus, these  
22 issues should be explored and be taken into consideration in future studies.  
23  
24  
25  
26  
27  
28  
29  
30  
31  
32  
33

34 The “hukou” system was used to classify T2DM patients into urban or rural residents.  
35 An association was found between poor glycaemic control and rural residents, which  
36 indicates health inequalities in T2DM management. This finding is consistent with  
37 another recently conducted study in China [5]. In addition to poor socioeconomic  
38 conditions of rural residents in China, no or delayed access to healthcare is a major  
39 issue in rural areas [34]. Even the health insurance system is different in rural and  
40 urban areas [35-37]. There are discrepancies in resource allocation between rural  
41 and urban areas. All these could explain the association found between poor  
42 glycaemic control and rural residents.  
43  
44  
45  
46  
47  
48  
49

50 Like T2DM, hyperlipidaemia is a risk factor for cardiovascular disease [38]. The  
51 association found between poor glycaemic control and hyperlipidaemia is consistent  
52 with previous studies [26,39]. Glycaemic control mainly depends on the degree of  
53 residual pancreatic  $\beta$ -cells function and insulin sensitivity [40,41]. It should be noted  
54 that in Chinese T2DM patients, the defects in  $\beta$ -cells function are more pronounced  
55  
56  
57  
58

1  
2  
3 than decreased insulin sensitivity [42,43]. Abnormalities in lipid metabolism,  
4 characterised by an increase in serum lipids (total cholesterol and triglycerides), may  
5 result in lipid spill over to non-adipose tissues, such as pancreatic  $\beta$ -cells. This may  
6 lead to cellular dysfunction and lipoapoptosis [44,45]. It is also accepted that high  
7 serum triglyceride level is associated with insulin resistance [46]. These mechanisms  
8 may partly explain the association found between poor glycaemic control and  
9 hyperlipidaemia. Further research needs to be conducted to confirm the role of  
10 hyperlipidaemia in long-term glycaemic control. In continuation, early initiation of  
11 lipid-lowering therapy in T2DM patients may reduce the risk for cardiovascular disease.  
12  
13  
14  
15  
16  
17

18 The study has a number of strengths and weaknesses. This is the first study to  
19 explore glycaemic control in T2DM patients at the tertiary care Diabetes Centre in  
20 Ningbo, China. In addition, as far as we are aware, this is the first study on this issue  
21 in the Zhejiang province of China. HbA1c and FBG were used to determine  
22 glycaemic control, which in turn provided a complete picture. HbA1c reflects the  
23 average blood glucose level over the past three months. On the other hand, FBG is  
24 a short-term index. In terms of generalisability, the study findings could be valid in  
25 settings with similar populations and healthcare systems. Missing data could lead to  
26 bias but were generally low in this study. Multiple regression analyses included a  
27 sample with missing values for the adjusted variables. This retrospective study was  
28 conducted using an existing database, which is primarily developed for the clinical  
29 purpose and not for research. It is possible that our findings were the result of other  
30 factors not present in the database and thus, not adjusted for in the models, such as  
31 self-monitoring of blood glucose, uptake and adherence to the T2DM therapeutic  
32 regimen, and depression, anxiety and stress levels of patients [25,47,48]. Although  
33 the data were available on time, however, the other data quality issues of routinely  
34 collected data cannot be ignored, such as accuracy and reliability. Some of the data  
35 were self-reported (e.g., duration of T2DM), and recall error could have been a  
36 problem. This inaccurate measurement of the variable could mean that individuals  
37 were assigned to the wrong category, and then resulted in an incorrect estimation of  
38 the association between duration of T2DM and poor glycaemic control. As this was a  
39 cross-sectional study, it was not possible to determine the causal association  
40 between different variables and glycaemic control. A long-term, longitudinal study  
41 should be conducted among these patients to assess the impact of various factors  
42  
43  
44  
45  
46  
47  
48  
49  
50  
51  
52  
53  
54  
55  
56  
57

(these as well as other potential factors) on their glycaemic control. Ours was a hospital-based study and a population-based study should be conducted, which might give a different picture. This could be because of different population characteristics, including their healthcare-seeking behavior.

In conclusion, more than half of T2DM patients at the Diabetes Centre in Ningbo, China have poor glycaemic control, and the predictors of glycaemic control were identified. The study findings could be taken into consideration in future interventional studies aimed at improving glycaemic control in these patients.

### **Authors' contributions**

JL and KC designed the study, analysed the data and wrote the first draft of the manuscript. JL, KC, MX, YC, FH, JC and LL revised it critically for important intellectual content and approved the final version.

### **Competing interests**

The authors declare that they have no competing interests.

### **Ethics approval and consent to participate**

The study used an existing computerised medical records database, the Diabetes Information Management System. The study was ethically approved by the Research Ethics Committee at the Ningbo First Hospital, China.

### **Data sharing**

The dataset will be available upon request unless there are legal or ethical reasons for not doing so.

### **Funding**

The study was supported by the Natural Science Foundation of Ningbo Municipality (CN) (Grant No. 2016A610169).

### **Acknowledgements**



1  
2  
3 The authors thank Yida Li (Yinal Software Corporation) for the management and  
4 organisation of original data and the patients.  
5  
6

## 7 **References**

- 10 1. International Diabetes Federation. IDF diabetes atlas. 8th edition. Brussels,  
11 Belgium. 2017.
- 12 2. World Health Organization. Global report on diabetes. Geneva, Switzerland. 2016.
- 13 3. World Health Organization. Rate of diabetes in China “explosive”.  
14 <http://www.wpro.who.int/china/mediacentre/releases/2016/20160406/en/> Accessed  
15 23 August 2017.
- 16 4. Cheng TO. Diabetes epidemic in China and its economic impact. *Int J Cardiol.*  
17 2011; 149:1-3.
- 18 5. Wang L, Gao P, Zhang M, Huang Z, Zhang D, Deng Q, Li Y, Zhao Z, Qin X, Jin D,  
19 Zhou M, Tang X, Hu Y, Wang L. Prevalence and ethnic pattern of diabetes and  
20 prediabetes in China in 2013. *JAMA.* 2017; 317:2515-23.
- 21 6. Ji L, Hu D, Pan C, Weng J, Huo Y, Ma C, Mu Y, Hao C, Ji Q, Ran X, Su B, Zhuo  
22 H, Fox KA, Weber M, Zhang D, CCMR Advisory Board, CCMR-3B Study  
23 Investigators. Primacy of the 3B approach to control risk factors for cardiovascular  
24 disease in type 2 diabetes patients. *Am J Med.* 2013; 126:925.e11-22.
- 25 7. Liu L, Lou Q, Guo X, Yuan L, Shen L, Sun Z, Zhao F, Dai X, Huang J, Yang H,  
26 Mordes JP, Chinese Diabetes Education Status Survey Study Group. Management  
27 status and its predictive factors in patients with type 2 diabetes in China: a  
28 nationwide multicenter study. *Diabetes Metab Res Rev.* 2015; 31:811-6.
- 29 8. Ji LN, Lu JM, Guo XH, Yang WY, Weng JP, Jia WP, Zou DJ, Zhou ZG, Yu DM,  
30 Liu J, Shan ZY, Yang YZ, Hu RM, Zhu DL, Yang LY, Chen L, Zhao ZG, Li QF, Tian  
31 HM, Ji QH, Liu J, Ge JP, Shi LX, Xu YC. Glycemic control among patients in China  
32 with type 2 diabetes mellitus receiving oral drugs or injectables. *BMC Public Health.*  
33 2013; 13:602.
- 34 9. Xu Y, Wang L, He J, Bi Y, Li M, Wang T, Wang L, Jiang Y, Dai M, Lu J, Xu M, Li  
35 Y, Hu N, Li J, Mi S, Chen CS, Li G, Mu Y, Zhao J, Kong L, Chen J, Lai S, Wang W,  
36 Zhao W, Ning G, 2010 China Noncommunicable Disease Surveillance Group.  
37 Prevalence and control of diabetes in Chinese adults. *JAMA.* 2013; 310:948-59.  
38  
39  
40  
41  
42  
43  
44  
45  
46  
47  
48  
49  
50  
51  
52  
53  
54  
55  
56  
57  
58



10. Lipska KJ, Yao X, Herrin J, McCoy RG, Ross JS, Steinman MA, Inzucchi SE, Gill TM, Krumholz HM, Shah ND. Trends in drug utilization, glycemic control, and rates of severe hypoglycemia, 2006-2013. *Diabetes Care*. 2017; 40:468-75.
11. Cheung BM, Ong KL, Cherny SS, Sham PC, Tso AW, Lam KS. Diabetes prevalence and therapeutic target achievement in the United States, 1999 to 2006. *Am J Med*. 2009; 122: 443-53.
12. Ministry of Health of the People's Republic of China. The measures for the administration of the hospital grade. 1989.
13. Yao DZ, Sun XH, Li JH, Guo WY. Prevalence and risk factors of diabetes in people over 40 years of age in Ningbo city area. *Modern Practical Medicine*. 2016; 28:1343-5.
14. The Public Health Service Platform of Ningbo. Ningbo First Hospital. <http://gzjk.nbws.gov.cn/f/mech?mechId=121> Accessed on 14 August 2017.
15. The National People's Congress of the People's Republic of China. Regulations of the People's Republic of China on Residence Registration. [http://www.npc.gov.cn/wxzl/gongbao/2000-12/10/content\\_5004332.htm](http://www.npc.gov.cn/wxzl/gongbao/2000-12/10/content_5004332.htm) Accessed on 23 August 2017.
16. Chinese Diabetes Society. China guideline for type 2 diabetes (2013 ed). *Chin J Endocrinol Metab*. 2014; 30:893-942.
17. China Expert Panel of Medical Nutrition Therapy for Overweight/Obesity. Expert consensus on medical nutrition therapy for overweight/obesity in China. *Chin J Diabetes Mellitus*. 2016; 9:525-40.
18. Ningbo Municipal Human Resources and Social Security Bureau. Catalogue of drugs for basic medical insurance. <http://www.zjnb.lss.gov.cn/cx/cxzx/ybxx/ybyp/ypmu/#Menu=1312> Accessed on 23 August 2017.
19. Bi Y, Zhu D, Cheng J, Zhu Y, Xu N, Cui S, Li W, Cheng X, Wang F, Hu Y, Shen S, Weng J. The status of glycemic control: a cross-sectional study of outpatients with type 2 diabetes mellitus across primary, secondary, and tertiary hospitals in the Jiangsu province of China. *Clin Ther*. 2010; 32:973-83.
20. Chiu M, Austin PC, Manuel DG, Shah BR, Tu JV. Deriving ethnic-specific BMI cutoff points for assessing diabetes risk. *Diabetes Care*. 2011; 34:1741-8.
21. Chan JC, Gagliardino JJ, Baik SH, Chantelot JM, Ferreira SR, Hancu N, Ilkova H, Ramachandran A, Aschner P, IDMPS Investigators. Multifaceted determinants for

1  
2  
3 achieving glycemc control: the international diabetes management practice study  
4 (IDMPS). *Diabetes Care*. 2009; 32:227-33.

5  
6 22. Shan S, Gu L, Lou Q, Ouyang X, Yu Y, Wu H, Bian R. Evaluation of glycemc  
7 control in patients with type 2 diabetes mellitus in Chinese communities: a cross-  
8 sectional study. *Clin Exp Med*. 2017; 17:79-84.

9  
10 23. Shani M, Taylor TR, Vinker S, Lustman A, Erez R, Elhayany A, Lahad A.  
11 Characteristics of diabetics with poor glycemc control who achieve good control. *J*  
12 *Am Board Fam Med*. 2008; 21:490-6.

13  
14 24. Roy S, Sherman A, Monari-Sparks MJ, Schweiker O, Jain N, Sims E, Breda M,  
15 Byraiah GP, Belecanech RG, Coletta MD, Barrios CJ, Hunter K, Gaughan JP.  
16 Association of comorbid and metabolic factors with optimal control of type 2 diabetes  
17 mellitus. *N Am J Med Sci*. 2016; 8:31-9.

18  
19 25. Kamuhabwa AR, Charles E. Predictors of poor glycemc control in type 2 diabetic  
20 patients attending public hospitals in Dar es Salaam. *Drug Healthc Patient Saf*. 2014;  
21 6:155-65.

22  
23 26. Sazlina SG, Mastura I, Cheong AT, Bujang Mohamad A, Jamaiyah H, Lee PY,  
24 Syed Alwi SA, Chew BH. Predictors of poor glycaemic control in older patients with  
25 type 2 diabetes mellitus. *Singapore Med J*. 2015; 56:284-90.

26  
27 27. Li MZ, Ji LN, Meng ZL, Guo XH, Yang JK, Lu JM, Lü XF, Hong X. Management  
28 status of type 2 diabetes mellitus in tertiary hospitals in Beijing: gap between  
29 guideline and reality. *Chin Med J (Engl)*. 2012; 125:4185-9.

30  
31 28. Khattab M, Khader YS, Al-Khawaldeh A, Ajlouni K. Factors associated with poor  
32 glycemc control among patients with type 2 diabetes. *J Diabetes Complications*.  
33 2010; 24:84-9.

34  
35 29. UK Prospective Diabetes Study Group. UK prospective diabetes study 16.  
36 Overview of 6 years' therapy of type II diabetes: a progressive disease. *Diabetes*.  
37 1995; 44:1249-58.

38  
39 30. Chiu CJ, Wray LA. Factors predicting glycemc control in middle-aged and older  
40 adults with type 2 diabetes. *Prev Chronic Dis*. 2010; 7:A08.

41  
42 31. Ji L, Zhang P, Weng J, Lu J, Guo X, Jia W, Yang W, Zou D, Zhou Z, Pan C, Gao  
43 Y, Li X, Zhu D, Li Y, Wu Y, Garg SK. Observational registry of basal insulin treatment  
44 (ORBIT) in patients with type 2 diabetes uncontrolled by oral hypoglycemc agents in  
45 China: study design and baseline characteristics. *Diabetes Technol Ther*. 2015;  
46 17:735-44.

- 1  
2  
3 32. Ross SA. Breaking down patient and physician barriers to optimize glycemic  
4 control in type 2 diabetes. *Am J Med.* 2013; 126:S38-48.  
5  
6 33. Le C, Rong S, Dingyun Y, Wenlong C. Socioeconomic disparities in type 2  
7 diabetes mellitus prevalence and self-management behaviors in rural southwest  
8 China. *Diabetes Res Clin Pract.* 2016; 121:9-16.  
9  
10 34. Syed ST, Gerber BS, Sharp LK. Traveling towards disease: transportation  
11 barriers to health care access. *J Community Health.* 2013; 38:976-93.  
12  
13 35. Yip WC, Hsiao WC, Chen W, Hu S, Ma J, Maynard A. Early appraisal of China's  
14 huge and complex health-care reforms. *Lancet.* 2012; 379:833-42.  
15  
16 36. Dong KY. Medical insurance system evolution in China. *China Economic*  
17 *Review.* 2009; 20:591-7.  
18  
19 37. Liu X, Wong H, Liu K. Outcome-based health equity across different social health  
20 insurance schemes for the elderly in China. *BMC Health Serv Res.* 2016; 16:9.  
21  
22 38. Nelson RH. Hyperlipidemia as a risk factor for cardiovascular disease. *Prim*  
23 *Care.* 2013; 40:195-211.  
24  
25 39. Zhang SL, Chen ZC, Yan L, Chen LH, Cheng H, Ji LN. Determinants for  
26 inadequate glycaemic control in Chinese patients with mild-to-moderate type 2  
27 diabetes on oral antidiabetic drugs alone. *Chin Med J (Engl).* 2011; 124:2461-8.  
28  
29 40. Dansuntornwong B, Chanprasertyothin S, Jongjaroenprasert W, Ngarmukos C,  
30 Bunnag P, Puavilai G, Ongphiphadhanakul B. The relation between parameters from  
31 homeostasis model assessment and glycemic control in type 2 diabetes. *J Med*  
32 *Assoc Thai.* 2007; 90:2284-90.  
33  
34 41. TODAY Study Group. Effects of metformin, metformin plus rosiglitazone, and  
35 metformin plus lifestyle on insulin sensitivity and  $\beta$ -cell function in TODAY. *Diabetes*  
36 *Care.* 2013; 36:1749-57.  
37  
38 42. China Insulin Secretion Study Group. Features of insulin secretion and insulin  
39 resistance in Chinese newly-diagnosed type 2 diabetes. *Chin J Endocrinol Metab.*  
40 2008; 24:256-60.  
41  
42 43. Xiao J, Weng J, Ji L, Jia W, Lu J, Shan Z, Liu J, Tian H, Ji Q, Yang Z, Yang W;  
43 China National Diabetes and Metabolic Disorders Study Group. Worse pancreatic  $\beta$ -  
44 cell function and better insulin sensitivity in older Chinese without diabetes. *J*  
45 *Gerontol A Biol Sci Med Sci.* 2014; 69:463-70.  
46  
47 44. Kusminski CM, Shetty S, Orzi L, Unger RH, Scherer PE. Diabetes and apoptosis:  
48 lipotoxicity. *Apoptosis.* 2009; 14:1484-95.  
49  
50  
51  
52  
53  
54  
55  
56  
57  
58

1  
2  
3 45. Irace C, Tripolino C, Carallo C, Scavelli FB, Valle ED, Cortese C, Gnasso A.  
4 Clinical predictors of progressive beta-cell failure in type 2 diabetes. *J Investig Med*.  
5 2015; 63:802-5.  
6

7 46. Li N, Fu J, Koonen DP, Kuivenhoven JA, Snieder H, Hofker MH. Are  
8 hypertriglyceridemia and low HDL causal factors in the development of insulin  
9 resistance? *Atherosclerosis*. 2014; 233:130-8.  
10

11 47. Gorska-Ciebiada M, Ciebiada M. Predictors of poor glycaemic control in type 2  
12 diabetic elderly patients with depressive syndrome. *Psychogeriatrics*. 2017; 7.  
13

14 48. Anderson RJ, Grigsby AB, Freedland KE, de Groot M, McGill JB, Clouse RE,  
15 Lustman PJ. Anxiety and poor glycemic control: a meta-analytic review of the  
16 literature. *Int J Psychiatry Med*. 2002; 32:235-47.  
17  
18  
19  
20  
21  
22  
23  
24  
25  
26  
27  
28  
29  
30  
31  
32  
33  
34  
35  
36  
37  
38  
39  
40  
41  
42  
43  
44  
45  
46  
47  
48  
49  
50  
51  
52  
53  
54  
55  
56  
57  
58  
59  
60

Table 1 Characteristics of T2DM patients with good and poor glycaemic control

|                       |                         | <b>Good<br/>glycaemic<br/>control<br/>HbA1c&lt;7%<br/>(n=689)</b> | <b>Poor<br/>glycaemic<br/>control<br/>HbA1c≥7%<br/>(n=698)</b> | <b>P value</b> | <b>Good<br/>glycaemic<br/>control<br/>FBG≤7.0<br/>mmol/L<br/>(n=596)</b> | <b>Poor<br/>glycaemic<br/>control<br/>FBG&gt;7.0<br/>mmol/L<br/>(n=791)</b> | <b>P value</b> |
|-----------------------|-------------------------|-------------------------------------------------------------------|----------------------------------------------------------------|----------------|--------------------------------------------------------------------------|-----------------------------------------------------------------------------|----------------|
| <b>Age</b>            |                         |                                                                   |                                                                |                |                                                                          |                                                                             |                |
|                       | 18-39 years             | 158 (22.9)                                                        | 81 (11.6)                                                      | <0.001         | 135 (22.7)                                                               | 104 (13.1)                                                                  | <0.001         |
|                       | 40-59 years             | 323 (46.9)                                                        | 300 (43.0)                                                     |                | 247 (41.4)                                                               | 376 (47.5)                                                                  |                |
|                       | ≥60 years               | 208 (30.2)                                                        | 317 (45.4)                                                     |                | 214 (35.9)                                                               | 311 (39.3)                                                                  |                |
| <b>Sex</b>            |                         |                                                                   |                                                                | 0.157          |                                                                          |                                                                             | 0.830          |
|                       | Male                    | 405 (58.8)                                                        | 384 (55.0)                                                     |                | 341 (57.2)                                                               | 448 (56.6)                                                                  |                |
|                       | Female                  | 284 (41.2)                                                        | 314 (45.0)                                                     |                | 255 (42.8)                                                               | 343 (43.4)                                                                  |                |
| <b>Education</b>      |                         |                                                                   |                                                                | <0.001         |                                                                          |                                                                             | <0.001         |
|                       | University/college      | 166 (24.1)                                                        | 102 (14.6)                                                     |                | 145 (24.3)                                                               | 123 (15.5)                                                                  |                |
|                       | Class 7-12              | 333 (48.3)                                                        | 310 (44.4)                                                     |                | 268 (45.0)                                                               | 375 (47.4)                                                                  |                |
|                       | Class 1-6               | 122 (17.7)                                                        | 204 (29.2)                                                     |                | 117 (19.6)                                                               | 209 (26.4)                                                                  |                |
|                       | No qualifications       | 35 (5.1)                                                          | 67 (9.6)                                                       |                | 45 (7.6)                                                                 | 57 (7.2)                                                                    |                |
|                       | Unknown                 | 33 (4.8)                                                          | 15 (2.1)                                                       |                | 21 (3.5)                                                                 | 27 (3.4)                                                                    |                |
| <b>Occupation</b>     |                         |                                                                   |                                                                | 0.064          |                                                                          |                                                                             | 0.231          |
|                       | Manual workers          | 94 (13.6)                                                         | 121 (17.3)                                                     |                | 87 (14.6)                                                                | 128 (16.2)                                                                  |                |
|                       | Non-manual workers      | 138 (20.0)                                                        | 141 (20.2)                                                     |                | 127 (21.3)                                                               | 152 (19.2)                                                                  |                |
|                       | Never worked/Retired    | 219 (31.8)                                                        | 317 (45.4)                                                     |                | 211 (35.4)                                                               | 325 (41.1)                                                                  |                |
|                       | Unknown                 | 238 (34.5)                                                        | 119 (17.0)                                                     |                | 171 (28.7)                                                               | 186 (23.5)                                                                  |                |
| <b>Marital status</b> |                         |                                                                   |                                                                | 0.200          |                                                                          |                                                                             | 0.312          |
|                       | Married                 | 510 (74.0)                                                        | 562 (80.5)                                                     |                | 446 (74.8)                                                               | 626 (79.1)                                                                  |                |
|                       | Single/divorced/widowed | 55 (8.0)                                                          | 77 (11.0)                                                      |                | 61 (10.2)                                                                | 71 (9.0)                                                                    |                |
|                       | Unknown                 | 124 (18.0)                                                        | 59 (8.5)                                                       |                | 89 (14.9)                                                                | 94 (11.9)                                                                   |                |
| <b>Residence</b>      |                         |                                                                   |                                                                | 0.012          |                                                                          |                                                                             | 0.042          |
|                       | Urban                   | 449 (65.2)                                                        | 412 (59.0)                                                     |                | 388 (65.1)                                                               | 473 (59.8)                                                                  |                |

|                                                                            |                                            |            |            |        |            |            |        |
|----------------------------------------------------------------------------|--------------------------------------------|------------|------------|--------|------------|------------|--------|
|                                                                            | Rural                                      | 231 (33.5) | 281 (40.3) |        | 202 (33.9) | 310 (39.2) |        |
|                                                                            | Unknown                                    | 9 (1.3)    | 5 (0.7)    |        | 6 (1.0)    | 8 (1.0)    |        |
| <b>Health insurance</b>                                                    |                                            |            |            | 0.583  |            |            | 0.704  |
|                                                                            | Yes                                        | 641 (93.0) | 644 (92.3) |        | 554 (93.0) | 731 (92.4) |        |
|                                                                            | No                                         | 48 (7.0)   | 54 (7.7)   |        | 42 (7.0)   | 60 (7.6)   |        |
| <b>Smoking</b>                                                             |                                            |            |            | 0.076  |            |            | 0.505  |
|                                                                            | No                                         | 567 (82.3) | 548 (78.5) |        | 484 (81.2) | 631 (79.8) |        |
|                                                                            | Yes                                        | 122 (17.7) | 150 (21.5) |        | 112 (18.8) | 160 (20.2) |        |
| <b>Alcohol drinking</b>                                                    |                                            |            |            | 0.182  |            |            | 0.040  |
|                                                                            | No                                         | 617 (89.6) | 609 (87.2) |        | 539 (90.4) | 687 (86.9) |        |
|                                                                            | Yes                                        | 72 (10.4)  | 89 (12.8)  |        | 57 (9.6)   | 104 (13.1) |        |
| <b>Family history of T2DM</b>                                              |                                            |            |            | 0.604  |            |            | 0.095  |
|                                                                            | No                                         | 429 (62.3) | 444 (63.6) |        | 390 (65.4) | 483 (61.1) |        |
|                                                                            | Yes                                        | 260 (37.7) | 254 (36.4) |        | 206 (34.6) | 308 (38.9) |        |
| <b>Duration of T2DM</b>                                                    |                                            |            |            |        |            |            |        |
|                                                                            | ≤1 year                                    | 207 (30.1) | 93 (13.3)  | <0.001 | 173 (29.0) | 127 (16.1) | <0.001 |
|                                                                            | >1 to 2 years                              | 77 (11.2)  | 44 (6.3)   |        | 55 (9.2)   | 66 (8.3)   |        |
|                                                                            | >2 to 4 years                              | 72 (10.4)  | 60 (8.6)   |        | 53 (8.9)   | 79 (10.0)  |        |
|                                                                            | >4 years                                   | 291 (42.2) | 487 (69.8) |        | 275 (46.2) | 503 (63.6) |        |
|                                                                            | Unknown                                    | 42 (6.1)   | 14 (2.0)   |        | 40 (6.7)   | 16 (2.0)   |        |
| <b>Number of visits to the Diabetes Centre for T2DM since registration</b> |                                            | 8 (4,13)*  | 8 (5,13)*  | 0.335  | 8 (4,13)*  | 8 (5,13)*  | 0.214  |
| <b>T2DM therapeutic regimen</b>                                            |                                            |            |            | <0.001 |            |            | <0.001 |
|                                                                            | Only diet and physical activity            | 99 (14.4)  | 45 (6.4)   |        | 92 (15.4)  | 52 (6.6)   |        |
|                                                                            | Diet and physical activity + OHD           | 335 (48.6) | 296 (42.4) |        | 267 (44.8) | 364 (46.0) |        |
|                                                                            | Diet and physical activity + insulin       | 38 (5.5)   | 27 (3.9)   |        | 31 (5.2)   | 34 (4.3)   |        |
|                                                                            | Diet and physical activity + OHD + insulin | 217 (31.5) | 330 (47.3) |        | 206 (34.6) | 341 (43.1) |        |

1  
2  
3  
4  
5  
6  
7  
8  
9  
10  
11  
12  
13  
14  
15  
16  
17  
18  
19  
20  
21  
22  
23  
24  
25  
26  
27  
28  
29  
30  
31  
32  
33  
34  
35  
36  
37  
38  
39  
40  
41  
42  
43  
44  
45  
46  
47

|                        |            |            |            |       |            |            |
|------------------------|------------|------------|------------|-------|------------|------------|
| <b>BMI</b>             |            |            |            | 0.817 |            | 0.907      |
|                        | Under      | 22 (3.2)   | 23 (3.3)   |       | 21 (3.5)   | 24 (3.0)   |
|                        | Normal     | 289 (41.9) | 280 (40.1) |       | 239 (40.1) | 330 (41.7) |
|                        | Overweight | 244 (35.4) | 265 (38.0) |       | 222 (37.3) | 287 (36.3) |
|                        | Obese      | 101 (14.7) | 107 (15.3) |       | 89 (14.9)  | 119 (15.1) |
|                        | Unknown    | 33 (4.8)   | 23 (3.3)   |       | 25 (4.2)   | 31 (3.9)   |
| <b>Hypertension</b>    |            |            |            | 0.005 |            | 0.847      |
|                        | No         | 321 (46.6) | 273 (39.1) |       | 257 (43.1) | 337 (42.6) |
|                        | Yes        | 368 (53.4) | 425 (60.9) |       | 339 (56.9) | 454 (57.4) |
| <b>Hyperlipidaemia</b> |            |            |            | 0.051 |            | 0.025      |
|                        | No         | 164 (23.8) | 136 (19.5) |       | 146 (24.5) | 154 (19.5) |
|                        | Yes        | 525 (76.2) | 562 (80.5) |       | 450 (75.5) | 637 (80.5) |

n(%), P value excludes unknown.  
\*Median (interquartile range (IQR)).

Table 2 Logistic regression analyses to determine factors independently associated with poor glycaemic control

|                         |                         | OR (95% CI)         | P value |
|-------------------------|-------------------------|---------------------|---------|
| <b>HbA1c≥7%</b>         |                         |                     |         |
| <b>Residence</b>        |                         |                     | <0.001  |
|                         | Urban                   | 1                   |         |
|                         | Rural                   | 1.68 (1.24 to 2.28) |         |
| <b>Duration of T2DM</b> |                         |                     | <0.001  |
|                         | ≤1 year                 | 1                   |         |
|                         | >1 to 2 years           | 1.84 (1.06 to 3.19) |         |
|                         | >2 to 4 years           | 3.32 (1.88 to 5.85) |         |
|                         | >4 years                | 5.98 (4.09 to 8.75) |         |
| <b>Marital status</b>   |                         |                     | 0.098   |
|                         | Married                 | 1                   |         |
|                         | Single/divorced/widowed | 1.45 (0.93 to 2.25) |         |

|                                            |               |                     |        |
|--------------------------------------------|---------------|---------------------|--------|
| <b>T2DM therapeutic regimen</b>            |               |                     | 0.001  |
| Only diet and physical activity            |               | 1                   |        |
| Diet and physical activity + OHD           |               | 1.80 (1.01 to 3.23) |        |
| Diet and physical activity + insulin       |               | 1.00 (0.43 to 2.33) |        |
| Diet and physical activity + OHD + insulin |               | 2.47 (1.38 to 4.41) |        |
| <b>Hyperlipidaemia</b>                     |               |                     | 0.008  |
|                                            | No            | 1                   |        |
|                                            | Yes           | 1.57 (1.12 to 2.19) |        |
| <b>FBG&gt;7mmol/L</b>                      |               |                     | 0.019  |
| <b>Residence</b>                           |               |                     |        |
|                                            | Urban         | 1                   |        |
|                                            | Rural         | 1.42 (1.06 to 1.91) |        |
| <b>Duration of T2DM</b>                    |               |                     | <0.001 |
|                                            | ≤1 year       | 1                   |        |
|                                            | >1 to 2 years | 2.10 (1.22 to 3.62) |        |
|                                            | >2 to 4 years | 2.48 (1.42 to 4.34) |        |
|                                            | >4 years      | 3.34 (2.32 to 4.80) |        |
| <b>T2DM therapeutic regimen</b>            |               |                     | 0.005  |
| Only diet and physical activity            |               | 1                   |        |
| Diet and physical activity + OHD           |               | 2.40 (1.36 to 4.26) |        |
| Diet and physical activity + insulin       |               | 2.02 (0.88 to 4.62) |        |
| Diet and physical activity + OHD + insulin |               | 2.78 (1.58 to 4.92) |        |
| <b>Hyperlipidaemia</b>                     |               |                     | 0.002  |
|                                            | No            | 1                   |        |
|                                            | Yes           | 1.68 (1.21 to 2.33) |        |
| <b>Hypertension</b>                        |               |                     | 0.045  |
|                                            | No            | 1                   |        |
|                                            | Yes           | 0.73 (0.54 to 0.99) |        |



Table 3 Sensitivity analyses: multiple logistic regression models included those variables with  $P \leq 0.20$  in simple logistic regressions

|                                            | OR (95% CI)         | P value |
|--------------------------------------------|---------------------|---------|
| <b>HbA1c <math>\geq 7\%</math></b>         |                     |         |
| <b>Residence</b>                           |                     | <0.001  |
| Urban                                      | 1                   |         |
| Rural                                      | 1.68 (1.24 to 2.29) |         |
| <b>Duration of T2DM</b>                    |                     | <0.001  |
| $\leq 1$ year                              | 1                   |         |
| >1 to 2 years                              | 1.83 (1.05 to 3.18) |         |
| >2 to 4 years                              | 3.29 (1.88 to 5.77) |         |
| >4 years                                   | 5.99 (4.09 to 8.76) |         |
| <b>Marital status</b>                      |                     | 0.096   |
| Married                                    | 1                   |         |
| Single/divorced/widowed                    | 1.45 (0.94 to 2.25) |         |
| <b>T2DM therapeutic regimen</b>            |                     | <0.001  |
| Only diet and physical activity            | 1                   |         |
| Diet and physical activity + OHD           | 1.93 (1.08 to 3.45) |         |
| Diet and physical activity + insulin       | 1.03 (0.45 to 2.39) |         |
| Diet and physical activity + OHD + insulin | 2.65 (1.49 to 4.72) |         |
| <b>Hyperlipidaemia</b>                     |                     | 0.007   |
| No                                         | 1                   |         |
| Yes                                        | 1.58 (1.13 to 2.20) |         |
| <b>FBG &gt; 7mmol/L</b>                    |                     |         |
| <b>Residence</b>                           |                     | 0.044   |
| Urban                                      | 1                   |         |
| Rural                                      | 1.28 (1.01 to 1.62) |         |
| <b>Duration of T2DM</b>                    |                     | <0.001  |
| $\leq 1$ year                              | 1                   |         |
| >1 to 2 years                              | 1.67 (1.08 to 2.60) |         |

|                                 |                                            |                     |       |
|---------------------------------|--------------------------------------------|---------------------|-------|
|                                 | >2 to 4 years                              | 2.16 (1.40 to 3.33) |       |
|                                 | >4 years                                   | 2.51 (1.89 to 3.32) |       |
| <b>T2DM therapeutic regimen</b> |                                            |                     | 0.002 |
|                                 | Only diet and physical activity            | 1                   |       |
|                                 | Diet and physical activity + OHD           | 1.90 (1.25 to 2.89) |       |
|                                 | Diet and physical activity + insulin       | 1.66 (0.87 to 3.19) |       |
|                                 | Diet and physical activity + OHD + insulin | 2.30 (1.50 to 3.52) |       |
| <b>Hyperlipidaemia</b>          |                                            |                     | 0.020 |
|                                 | No                                         | 1                   |       |
|                                 | Yes                                        | 1.39 (1.05 to 1.83) |       |

STROBE 2007 (v4) Statement—Checklist of items that should be included in reports of *cross-sectional studies*

| Section/Topic             | Item # | Recommendation                                                                                                                                                                       | Reported on page # |
|---------------------------|--------|--------------------------------------------------------------------------------------------------------------------------------------------------------------------------------------|--------------------|
| Title and abstract        | 1      | (a) Indicate the study’s design with a commonly used term in the title or the abstract                                                                                               | 1,2                |
|                           |        | (b) Provide in the abstract an informative and balanced summary of what was done and what was found                                                                                  | 2                  |
| <b>Introduction</b>       |        |                                                                                                                                                                                      |                    |
| Background/rationale      | 2      | Explain the scientific background and rationale for the investigation being reported                                                                                                 | 4                  |
| Objectives                | 3      | State specific objectives, including any prespecified hypotheses                                                                                                                     | 4                  |
| <b>Methods</b>            |        |                                                                                                                                                                                      |                    |
| Study design              | 4      | Present key elements of study design early in the paper                                                                                                                              | 4,5                |
| Setting                   | 5      | Describe the setting, locations, and relevant dates, including periods of recruitment, exposure, follow-up, and data collection                                                      | 4,5                |
| Participants              | 6      | (a) Give the eligibility criteria, and the sources and methods of selection of participants                                                                                          | 4,5                |
| Variables                 | 7      | Clearly define all outcomes, exposures, predictors, potential confounders, and effect modifiers. Give diagnostic criteria, if applicable                                             | 5,6                |
| Data sources/ measurement | 8*     | For each variable of interest, give sources of data and details of methods of assessment (measurement). Describe comparability of assessment methods if there is more than one group | 5,6                |
| Bias                      | 9      | Describe any efforts to address potential sources of bias                                                                                                                            | 5,6                |
| Study size                | 10     | Explain how the study size was arrived at                                                                                                                                            | 4,5                |
| Quantitative variables    | 11     | Explain how quantitative variables were handled in the analyses. If applicable, describe which groupings were chosen and why                                                         | 5,6                |
| Statistical methods       | 12     | (a) Describe all statistical methods, including those used to control for confounding                                                                                                | 6                  |
|                           |        | (b) Describe any methods used to examine subgroups and interactions                                                                                                                  | n/a                |
|                           |        | (c) Explain how missing data were addressed                                                                                                                                          | 6                  |
|                           |        | (d) If applicable, describe analytical methods taking account of sampling strategy                                                                                                   | n/a                |
|                           |        | (e) Describe any sensitivity analyses                                                                                                                                                | 6                  |
| <b>Results</b>            |        |                                                                                                                                                                                      |                    |

|                          |     |                                                                                                                                                                                                              |                  |
|--------------------------|-----|--------------------------------------------------------------------------------------------------------------------------------------------------------------------------------------------------------------|------------------|
| Participants             | 13* | (a) Report numbers of individuals at each stage of study—eg numbers potentially eligible, examined for eligibility, confirmed eligible, included in the study, completing follow-up, and analysed            | 5,6              |
|                          |     | (b) Give reasons for non-participation at each stage                                                                                                                                                         | n/a              |
|                          |     | (c) Consider use of a flow diagram                                                                                                                                                                           | n/a              |
| Descriptive data         | 14* | (a) Give characteristics of study participants (eg demographic, clinical, social) and information on exposures and potential confounders                                                                     | 6, table 1       |
|                          |     | (b) Indicate number of participants with missing data for each variable of interest                                                                                                                          | table 1          |
| Outcome data             | 15* | Report numbers of outcome events or summary measures                                                                                                                                                         | 6, table 1       |
| Main results             | 16  | (a) Give unadjusted estimates and, if applicable, confounder-adjusted estimates and their precision (eg, 95% confidence interval). Make clear which confounders were adjusted for and why they were included | 6,7, table 1,2   |
|                          |     | (b) Report category boundaries when continuous variables were categorized                                                                                                                                    | 6,7, table 1,2,3 |
|                          |     | (c) If relevant, consider translating estimates of relative risk into absolute risk for a meaningful time period                                                                                             | n/a              |
| Other analyses           | 17  | Report other analyses done—eg analyses of subgroups and interactions, and sensitivity analyses                                                                                                               | 7, table 3       |
| <b>Discussion</b>        |     |                                                                                                                                                                                                              |                  |
| Key results              | 18  | Summarise key results with reference to study objectives                                                                                                                                                     | 7,8,9            |
| Limitations              | 19  | Discuss limitations of the study, taking into account sources of potential bias or imprecision. Discuss both direction and magnitude of any potential bias                                                   | 10               |
| Interpretation           | 20  | Give a cautious overall interpretation of results considering objectives, limitations, multiplicity of analyses, results from similar studies, and other relevant evidence                                   | 7,8,9            |
| Generalisability         | 21  | Discuss the generalisability (external validity) of the study results                                                                                                                                        | 10               |
| <b>Other information</b> |     |                                                                                                                                                                                                              |                  |
| Funding                  | 22  | Give the source of funding and the role of the funders for the present study and, if applicable, for the original study on which the present article is based                                                | 11               |

\*Give information separately for cases and controls in case-control studies and, if applicable, for exposed and unexposed groups in cohort and cross-sectional studies.

**Note:** An Explanation and Elaboration article discusses each checklist item and gives methodological background and published examples of transparent reporting. The STROBE checklist is best used in conjunction with this article (freely available on the Web sites of PLoS Medicine at <http://www.plosmedicine.org/>, Annals of Internal Medicine at <http://www.annals.org/>, and Epidemiology at <http://www.epidem.com/>). Information on the STROBE Initiative is available at [www.strobe-statement.org](http://www.strobe-statement.org).
